# Supplementary material for: Stress-testing pelvic autosegmentation algorithms using anatomical edge cases
Source: PubMed Central journal article supplement (PMC9922913; doi:10.1016/j.phro.2023.100413), 2023-01-16
Supplement: mmc1.pdf [file mmc1.pdf]

1 **Supplementary Figure 1:** Overall performance of autosegmentation tools on normal and edge  
2 case cohorts. In the upper and lower panels, the distribution of 95% Hausdorff distances and  
3 mean surface distances, respectively, in millimeters (y-axis) is shown as box plots for each of  
4 three cohorts of individuals (“Normal” shown in gray, “Edge-case” with a single anatomic  
5 variant shown in pink, and “Edge-case ++” with two or more simultaneous anatomic variants  
6 shown in dark red), where each datapoint is an average across all structures for that individual.  
7 Performance is reported for each of three autosegmentation tools: atlas-based  
8 autosegmentation [AB], model-based segmentation [MB], and deep-learning based  
9 segmentation [DL]). Statistically significant differences between normal and edge case  
10 performance are denoted by asterisks, where (\*) and (\*\*) represent  $p < 0.05$  and  $p < 0.001$ ,  
11 respectively (Wilcoxon Rank-Sum test).  
12  
13

Normal v. Edge-case Performance

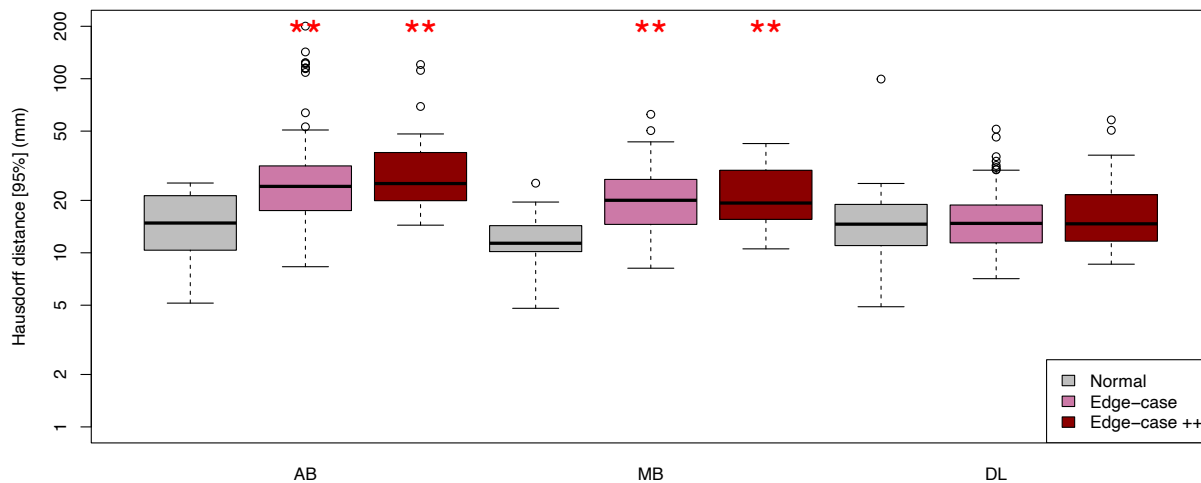

Normal v. Edge-case Performance

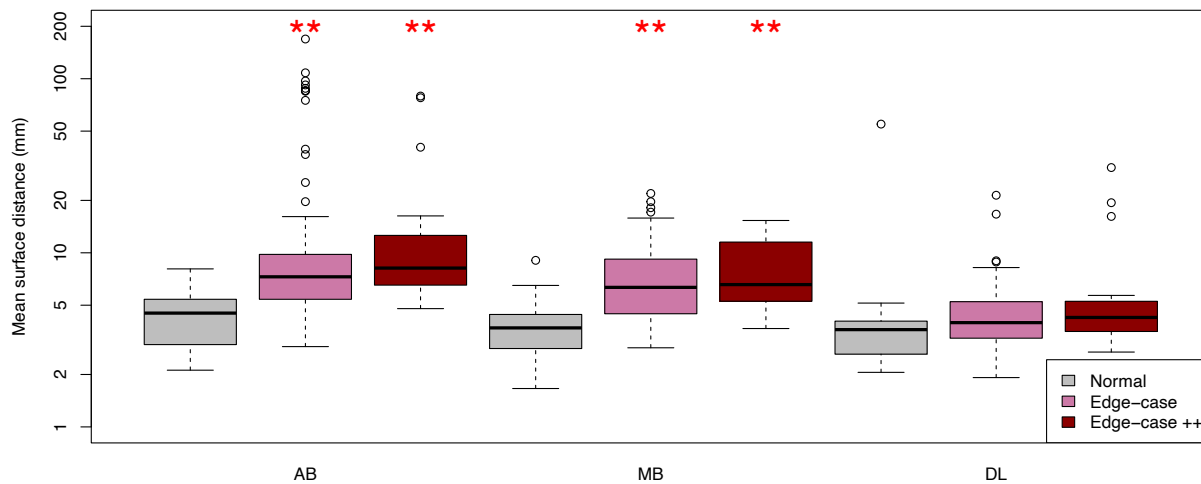

15 **Supplementary Figure 2:** Structure-specific performance of deep learning autosegmentation  
16 across normal and discrete edge case cohorts. The distribution of Dice similarity coefficients  
17 (DSC, y-axis) is shown here as box plots for each of nine cohorts of individuals corresponding to  
18 “Normal” (gray), and eight distinct classes of anatomical variation defined and numbered in  
19 Methods: 1) “Hypertrophy” (blue), 2) “Droopy SVs” (white), 3) “Hardware” (light orange), 4)  
20 “Surface” (pink), 5) “High-Z Foci” (light blue), 6) “Catheter” (green), 7) “SpaceOAR” (orange),  
21 and 8) “Other” (yellow), sorted according to median DSC. Each pane corresponds to a specific  
22 structure, as labeled along y-axis, with “Femurs” representing the average result from bilateral  
23 structures. Statistically significant differences between normal and edge case performance are  
24 denoted by asterisks, where (\*) and (\*\*) represent  $p < 0.05$  and  $p < 0.001$ , respectively (Wilcoxon  
25 Rank-Sum test).  
26

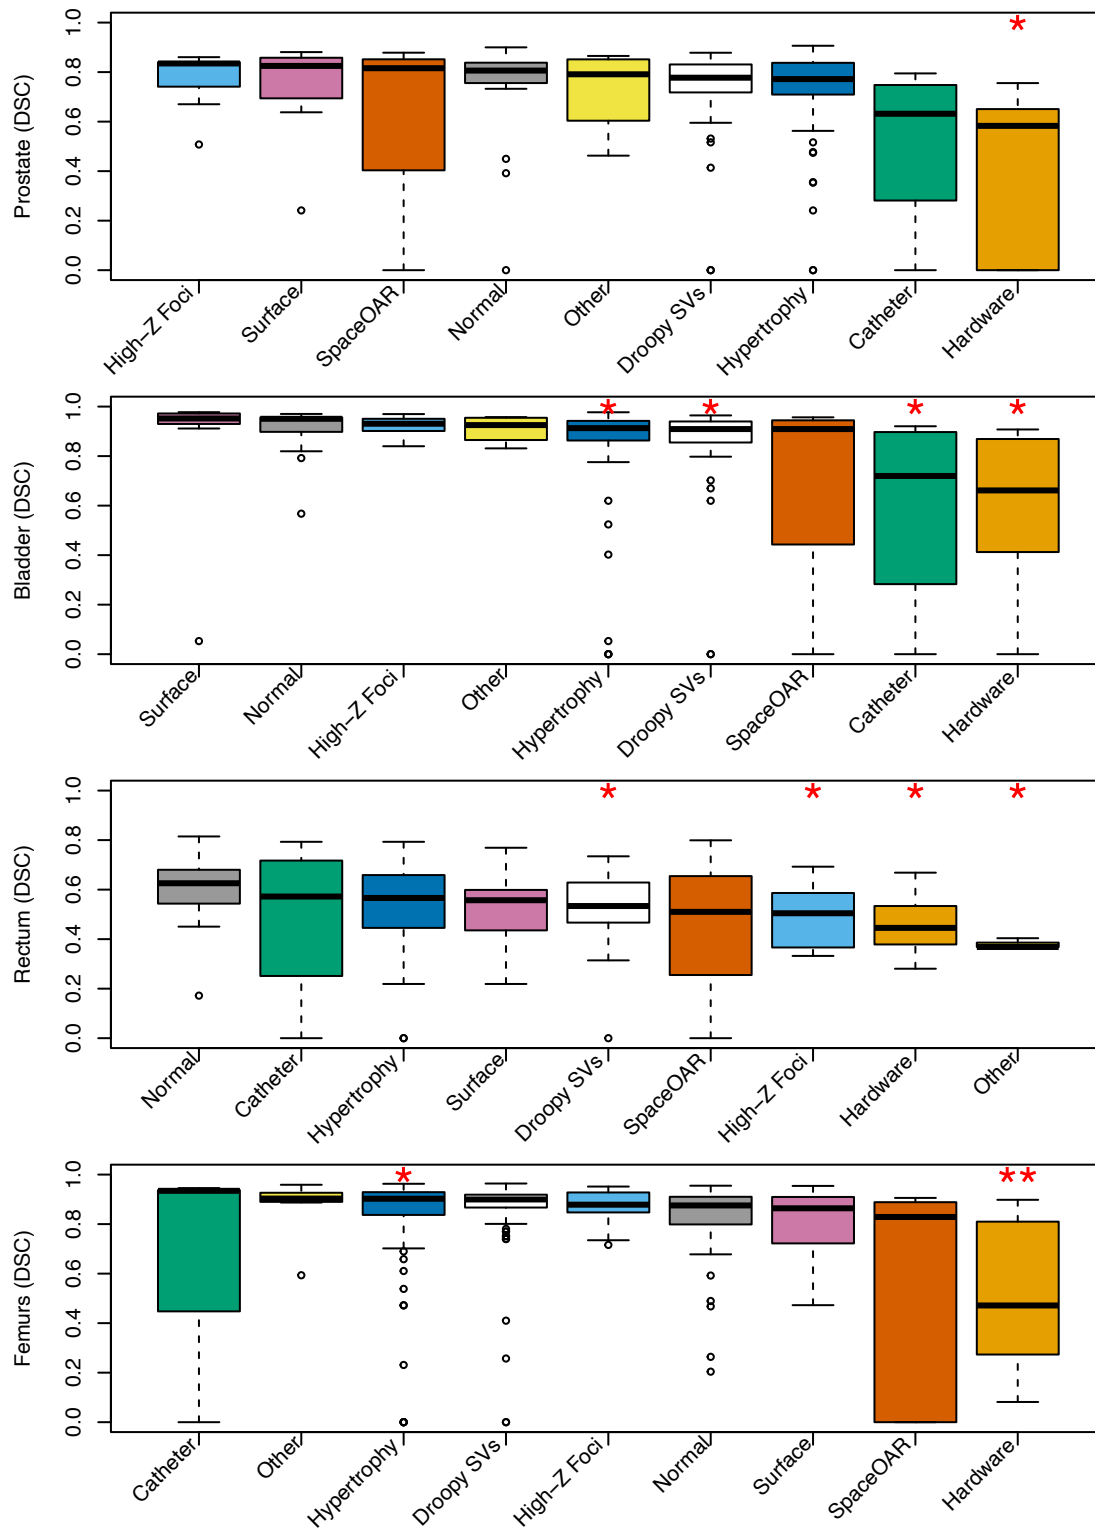

28 **Supplementary Figure 3:** Structure-specific performance of deep learning autosegmentation  
29 across normal and discrete edge case cohorts. The distribution of mean surface distances in  
30 millimeters (MSD, y-axis) is shown here as box plots for each of nine cohorts of individuals  
31 corresponding to “Normal” (gray), and eight distinct classes of anatomical variation defined and  
32 numbered in Methods: 1) “Hypertrophy” (blue), 2) “Droopy SVs” (white), 3) “Hardware” (light  
33 orange), 4) “Surface” (pink), 5) “High-Z Foci” (light blue), 6) “Catheter” (green), 7) “SpaceOAR”  
34 (orange), and 8) “Other” (yellow), sorted according to median MSD. Each pane corresponds to a  
35 specific structure, as labeled along y-axis, with “Femurs” representing the average result from  
36 bilateral structures. Statistically significant differences between normal and edge case  
37 performance are denoted by asterisks, where (\*) and (\*\*) represent  $p < 0.05$  and  $p < 0.001$ ,  
38 respectively (Wilcoxon Rank-Sum test).  
39  
40

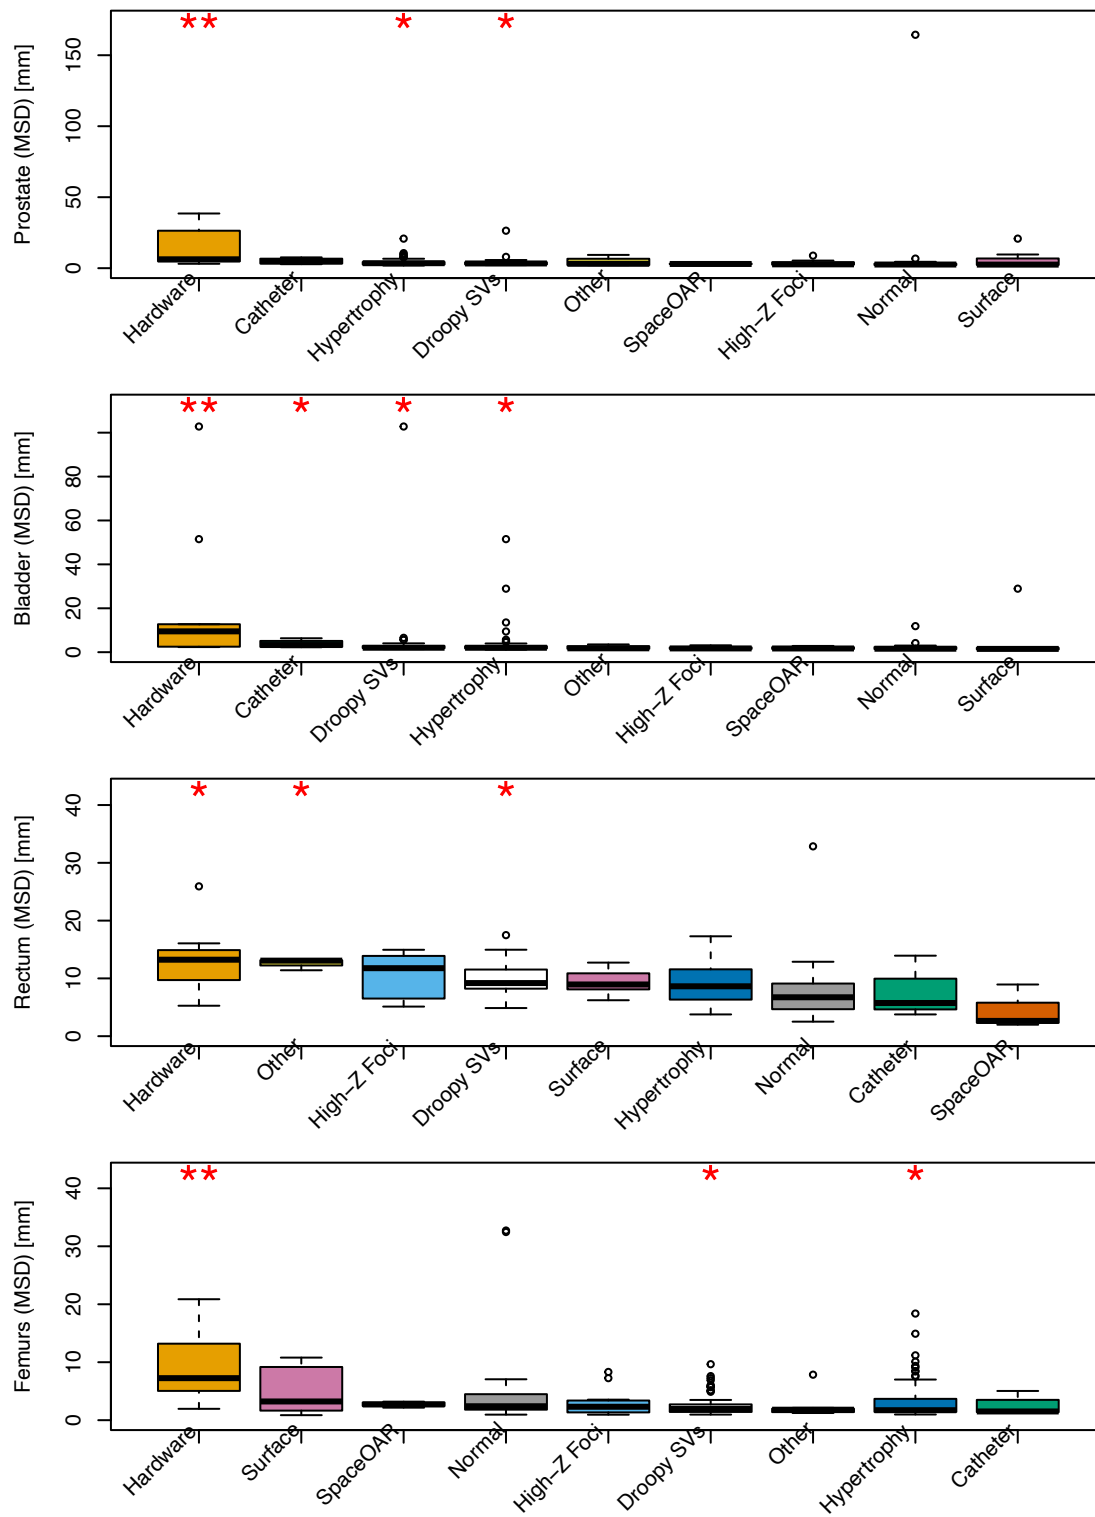

43 **Supplementary Figure 4:** Structure-specific performance of deep learning autosegmentation  
44 across normal and discrete edge case cohorts. The distribution of 95% Hausdorff distances in  
45 millimeters (HD 95%, y-axis) is shown here as box plots for each of nine cohorts of individuals  
46 corresponding to “Normal” (gray), and eight distinct classes of anatomical variation defined and  
47 numbered in Methods: 1) “Hypertrophy” (blue), 2) “Droopy SVs” (white), 3) “Hardware” (light  
48 orange), 4) “Surface” (pink), 5) “High-Z Foci” (light blue), 6) “Catheter” (green), 7) “SpaceOAR”  
49 (orange), and 8) “Other” (yellow), sorted according to median HD 95%. Each pane corresponds  
50 to a specific structure, as labeled along y-axis, with “Femurs” representing the average result  
51 from bilateral structures. Statistically significant differences between normal and edge case  
52 performance are denoted by asterisks, where (\*) and (\*\*) represent  $p < 0.05$  and  $p < 0.001$ ,  
53 respectively (Wilcoxon Rank-Sum test).  
54

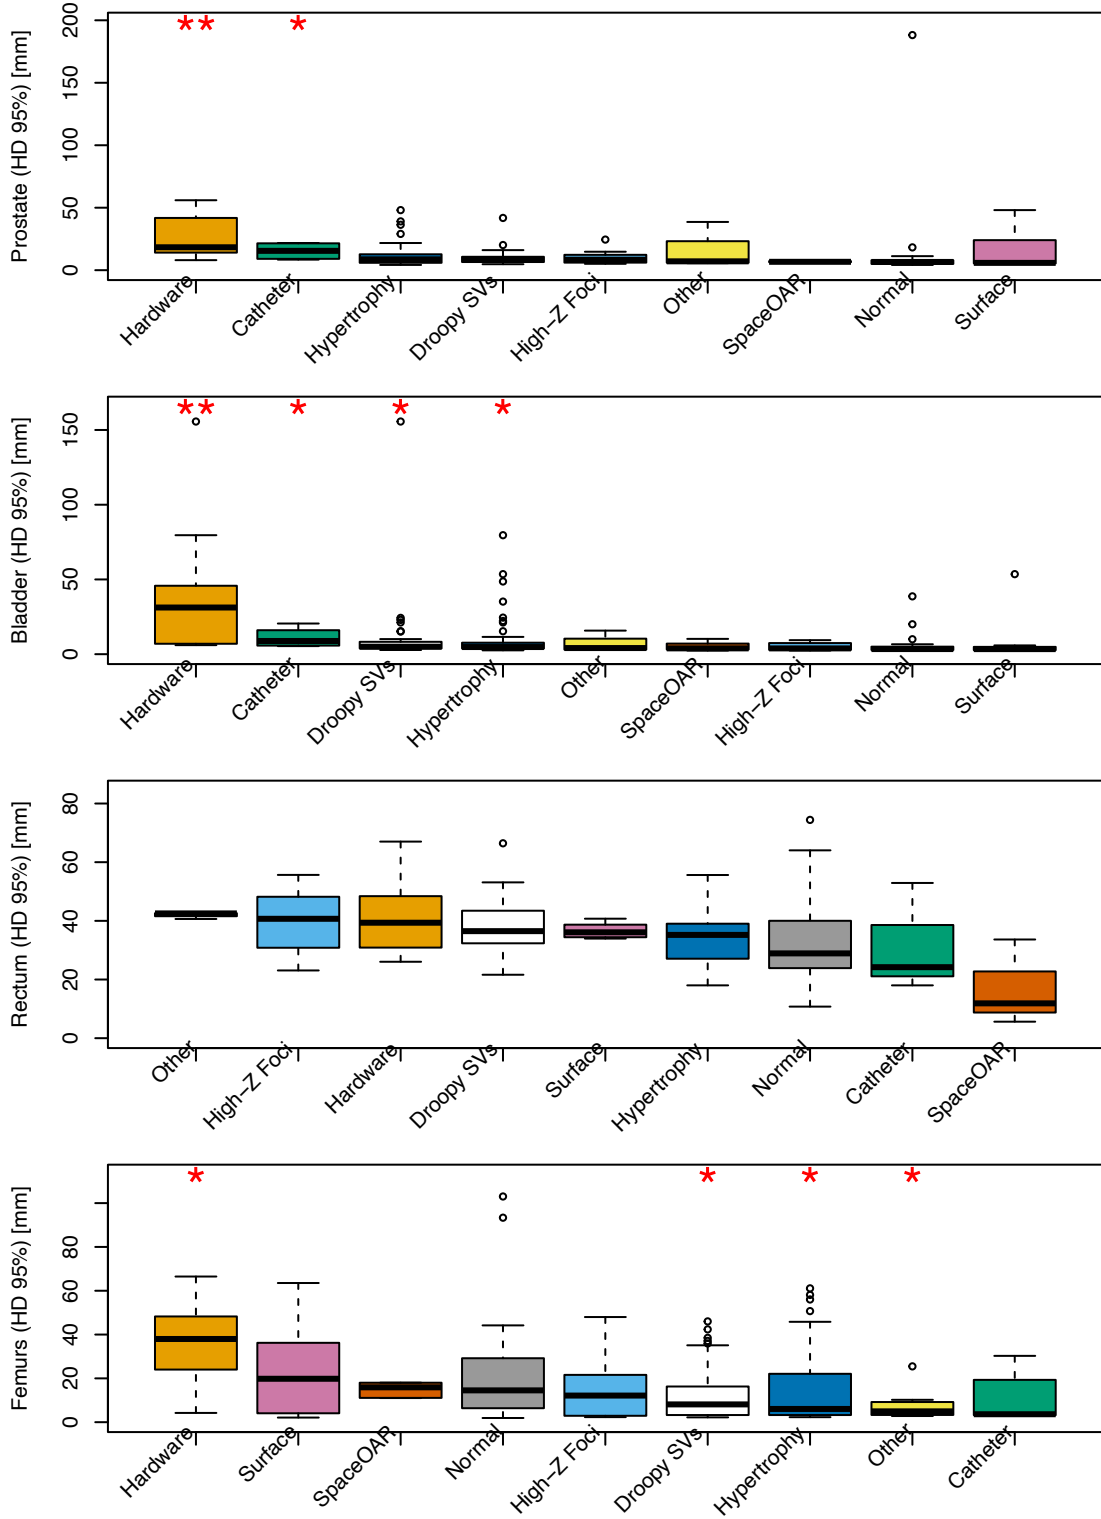



56 **Supplementary Figure 5:** Structure-specific performance of model-based autosegmentation  
57 across normal and discrete edge case cohorts. The distribution of Dice similarity coefficients  
58 (DSC, y-axis) is shown here as box plots for each of nine cohorts of individuals corresponding to  
59 “Normal” (gray), and eight distinct classes of anatomical variation defined and numbered in  
60 Methods: 1) “Hypertrophy” (blue), 2) “Droopy SVs” (white), 3) “Hardware” (light orange), 4)  
61 “Surface” (pink), 5) “High-Z Foci” (light blue), 6) “Catheter” (green), 7) “SpaceOAR” (orange),  
62 and 8) “Other” (yellow), sorted according to median DSC. Each pane corresponds to a specific  
63 structure, as labeled along y-axis, with “Femurs” representing the average result from bilateral  
64 structures. Statistically significant differences between normal and edge case performance are  
65 denoted by asterisks, where (\*) and (\*\*) represent  $p < 0.05$  and  $p < 0.001$ , respectively (Wilcoxon  
66 Rank-Sum test).  
67

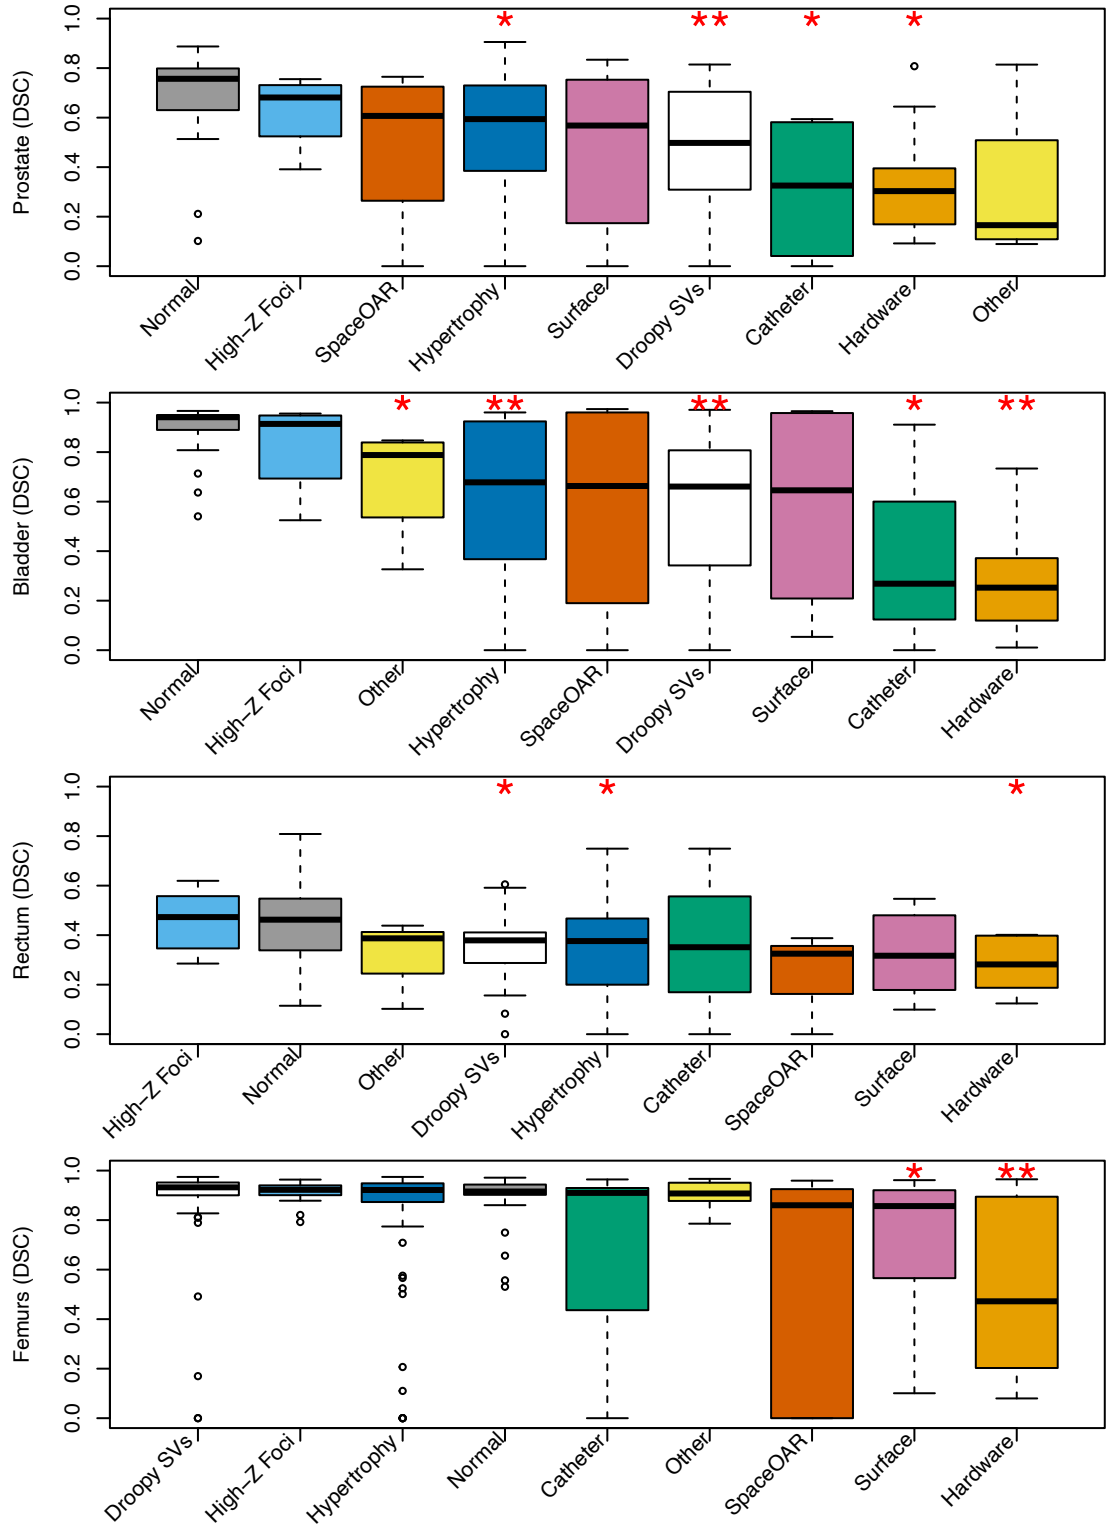

69 **Supplementary Figure 6:** Structure-specific performance of atlas-based autosegmentation  
70 across normal and discrete edge case cohorts. The distribution of Dice similarity coefficients  
71 (DSC, y-axis) is shown here as box plots for each of nine cohorts of individuals corresponding to  
72 “Normal” (gray), and eight distinct classes of anatomical variation defined and numbered in  
73 Methods: 1) “Hypertrophy” (blue), 2) “Droopy SVs” (white), 3) “Hardware” (light orange), 4)  
74 “Surface” (pink), 5) “High-Z Foci” (light blue), 6) “Catheter” (green), 7) “SpaceOAR” (orange),  
75 and 8) “Other” (yellow), sorted according to median DSC. Each pane corresponds to a specific  
76 structure, as labeled along y-axis, with “Femurs” representing the average result from bilateral  
77 structures. Statistically significant differences between normal and edge case performance are  
78 denoted by asterisks, where (\*) and (\*\*) represent  $p < 0.05$  and  $p < 0.001$ , respectively (Wilcoxon  
79 Rank-Sum test).

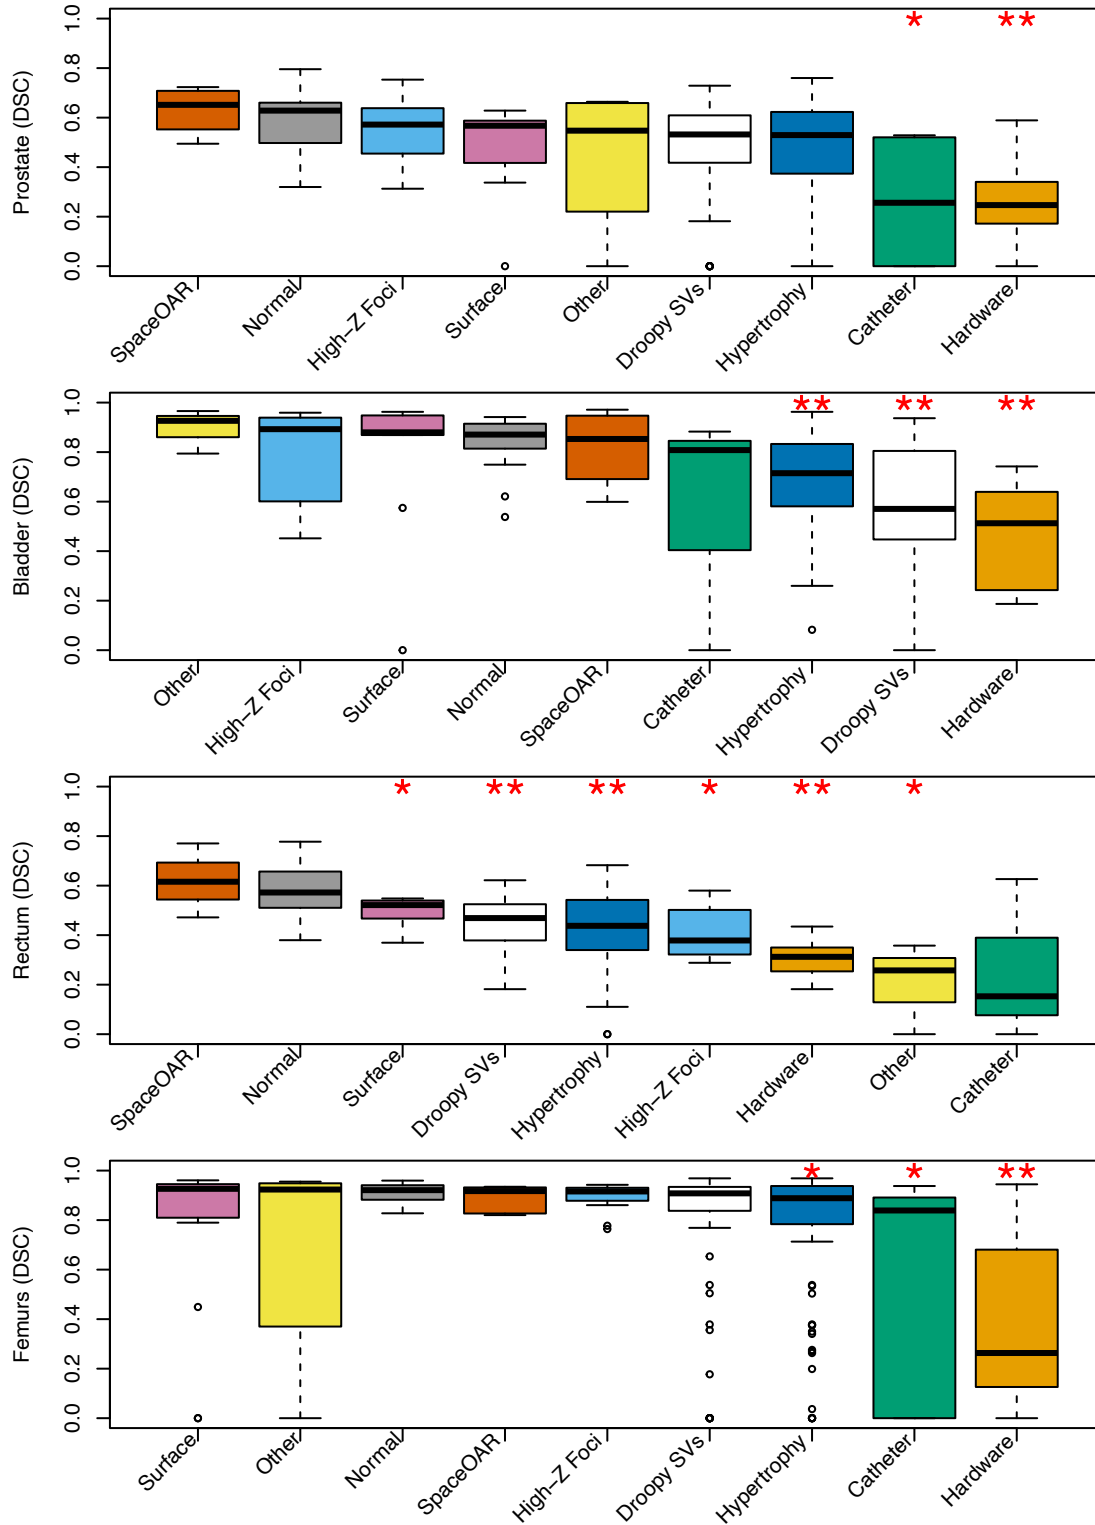

82 **Supplementary Figure 7:** Structure-specific performance of deep learning autosegmentation  
83 across normal and edge case cohorts. The distribution of Dice similarity coefficients (DSC, y-  
84 axis) is shown here as box plots for each of five structures ("Prostate", "Rectum", "Bladder",  
85 "Femur (L)", and "Femur (R)") corresponding to normal (gray) and edge cases (red). Statistically  
86 significant differences between normal and edge case performance are denoted by asterisks,  
87 where (\*) represents  $p < 0.05$  (Wilcoxon Rank-Sum test).  
88

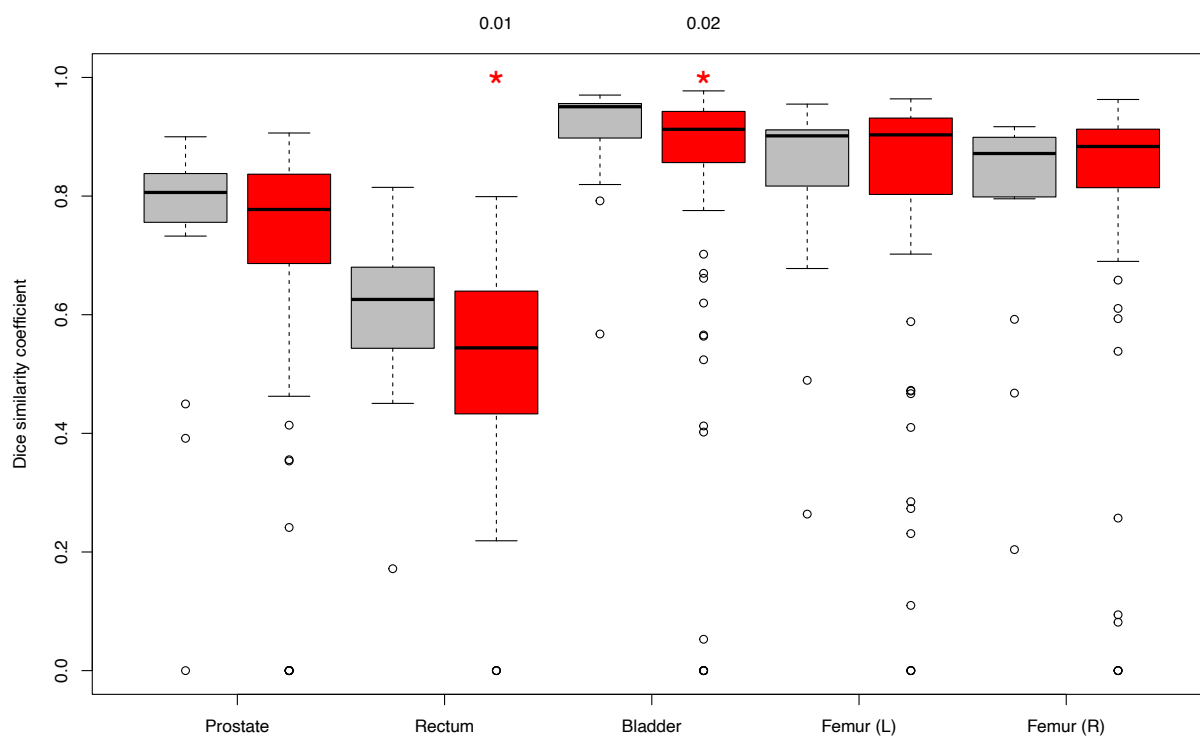

89

**Supplementary Table 1. Characteristics of different classes of anatomical edge cases. P-values, calculated by Wilcoxon Rank-Sum test for each class of edge case v. normal, are shown where significant (<0.05). Volumes (vol.) in cubic centimeters (cm3) are median values per group.**

| Class | Description                   | Size (n) | Prostate vol. (cm3) | pval (Prostate) | Bladder vol. (cm3) | pval (Bladder) | Rectum vol. (cm3) | pval (Rectum) |
|-------|-------------------------------|----------|---------------------|-----------------|--------------------|----------------|-------------------|---------------|
|       | Normal                        | 19       | 50.91               |                 | 177.3              |                | 45.31             |               |
| 1     | Prostate hypertrophy          | 52       | 80.46               | <0.001          | 125.47             |                | 32.18             | 0.02          |
| 2     | "Droopy" seminal vesicles     | 37       | 61.8                | 0.03            | 114.86             | 0.04           | 32.89             | 0.04          |
| 3     | Hip arthroplasty              | 11       | 53.61               |                 | 72.51              | <0.01          | 32.37             | 0.02          |
| 4     | Prostate surface irregularity | 9        | 63.45               |                 | 225.25             |                | 32.8              |               |
| 5     | Calcifications                | 8        | 61.17               |                 | 113.91             |                | 24.84             | 0.01          |
| 6     | Foley catheter                | 4        | 112.66              | 0.04            | 108.45             |                | 40.04             |               |
| 7     | SpaceOAR                      | 4        | 56.72               |                 | 173.63             |                | 62.51             |               |
| 8     | Narrow rectum                 | 2        | 55.01               |                 | 245.62             |                | 26.57             |               |
| 8     | In-field bowel                | 1        | 50.83               |                 | 61.55              |                | 24.97             |               |
| 8     | Morbid obesity                | 1        | 88.43               |                 | 180.12             |                | 51.52             |               |
|       | TOTAL                         | 131      |                     |                 |                    |                |                   |               |

**Supplementary Table 2. Cohort details (individual cases). Structure volumes listed in cubic centimeters (cc).**

| ID  | Cohort                        | Cohort (2)                | Prostate (cc) | Bladder (cc) | Rectum (cc) |
|-----|-------------------------------|---------------------------|---------------|--------------|-------------|
| 1   | Prostate surface irregularity |                           | 63.45         | 147.53       | 40.01       |
| 2   | "Droopy" seminal vesicles     |                           | 47.60         | 157.43       | 19.05       |
| 3   | "Droopy" seminal vesicles     |                           | 46.98         | 83.62        | 27.26       |
| 4   | Prostate hypertrophy          |                           | 137.13        | 282.27       | 53.48       |
| 5   | Prostate hypertrophy          |                           | 72.62         | 119.53       | 72.56       |
| 6   | Seeds, calcifications         |                           | 83.96         | 158.02       | 16.85       |
| 7   | Prostate hypertrophy          |                           | 206.97        | 178.54       | 32.48       |
| 8   | Normal                        |                           | 128.95        | 127.63       | 42.04       |
| 9   | Prostate surface irregularity |                           | 50.29         | 360.88       | 15.77       |
| 10  | Hip arthroplasty              |                           | 38.88         | 87.34        | 33.06       |
| 11  | Seeds, calcifications         |                           | 69.45         | 104.80       | 55.81       |
| 12  | Hip arthroplasty              |                           | 57.83         | 72.51        | 44.09       |
| 13  | Prostate hypertrophy          |                           | 65.92         | 92.93        | 25.85       |
| 14  | Prostate surface irregularity | Prostate hypertrophy      | 194.03        | 257.90       | 32.80       |
| 15  | Prostate hypertrophy          |                           | 151.35        | 251.53       | 57.33       |
| 16  | Prostate hypertrophy          | "Droopy" seminal vesicles | 56.67         | 127.16       | 36.72       |
| 17  | "Droopy" seminal vesicles     |                           | 61.80         | 115.00       | 21.41       |
| 18  | "Droopy" seminal vesicles     |                           | 56.99         | 152.49       | 67.82       |
| 19  | Prostate hypertrophy          |                           | 89.11         | 188.66       | 32.29       |
| 20  | Prostate surface irregularity |                           | 67.89         | 165.18       | 32.05       |
| 21  | Prostate hypertrophy          |                           | 84.27         | 110.80       | 18.70       |
| 22  | Foley catheter                |                           | 79.69         | 79.79        | 52.84       |
| 23  | Prostate hypertrophy          |                           | 136.43        | 98.19        | 44.30       |
| 24  | In-field bowel                |                           | 50.83         | 61.55        | 24.97       |
| 25  | "Droopy" seminal vesicles     |                           | 105.35        | 117.51       | 25.03       |
| 26  | "Droopy" seminal vesicles     | Hip arthroplasty          | 37.30         | 84.86        | 33.53       |
| 27  | "Droopy" seminal vesicles     |                           | 46.82         | 62.41        | 22.00       |
| 28  | Hip arthroplasty              |                           | 85.05         | 145.89       | 27.59       |
| 29  | Foley catheter                | Prostate hypertrophy      | 182.71        | 137.11       | 65.07       |
| 30  | Seeds, calcifications         |                           | 83.76         | 140.00       | 26.80       |
| 31  | "Droopy" seminal vesicles     |                           | 118.70        | 158.30       | 28.79       |
| 32  | Prostate hypertrophy          |                           | 79.70         | 236.66       | 18.52       |
| 33  | Prostate hypertrophy          |                           | 43.90         | 175.42       | 19.53       |
| 34  | Prostate hypertrophy          |                           | 166.90        | 114.33       | 17.79       |
| 35  | Hip arthroplasty              |                           | 54.18         | 63.12        | 27.03       |
| 36  | Prostate hypertrophy          |                           | 197.61        | 49.63        | 30.54       |
| 37  | Prostate hypertrophy          |                           | 75.19         | 332.99       | 29.63       |
| 38  | Prostate hypertrophy          | "Droopy" seminal vesicles | 50.53         | 204.27       | 60.23       |
| 39  | Seeds, calcifications         |                           | 39.44         | 70.50        | 26.16       |
| 40  | "Droopy" seminal vesicles     |                           | 85.56         | 60.61        | 17.36       |
| 41  | Foley catheter                |                           | 43.81         | 73.99        | 27.25       |
| 42  | Seeds, calcifications         |                           | 51.46         | 61.56        | 23.52       |
| 43  | "Droopy" seminal vesicles     |                           | 48.03         | 66.74        | 16.66       |
| 44  | Narrow rectum                 |                           | 63.61         | 254.20       | 32.47       |
| 45  | Prostate hypertrophy          | "Droopy" seminal vesicles | 80.98         | 176.19       | 26.01       |
| 46  | Prostate hypertrophy          |                           | 94.34         | 122.04       | 17.10       |
| 47  | "Droopy" seminal vesicles     |                           | 65.38         | 242.32       | 50.79       |
| 48  | "Droopy" seminal vesicles     |                           | 85.76         | 295.42       | 24.34       |
| 49  | Hip arthroplasty              |                           | 36.97         | 103.59       | 23.62       |
| 50  | "Droopy" seminal vesicles     |                           | 95.36         | 114.86       | 43.57       |
| 51  | Prostate surface irregularity | Prostate hypertrophy      | 151.46        | 507.35       | 28.31       |
| 52  | Prostate hypertrophy          |                           | 79.80         | 483.27       | 43.63       |
| 53  | Seeds, calcifications         |                           | 34.73         | 122.26       | 18.42       |
| 54  | "Droopy" seminal vesicles     |                           | 40.56         | 52.72        | 40.11       |
| 55  | Prostate surface irregularity |                           | 75.66         | 348.29       | 90.39       |
| 56  | Prostate hypertrophy          |                           | 106.95        | 234.02       | 32.96       |
| 57  | Prostate hypertrophy          |                           | 47.87         | 90.25        | 49.44       |
| 58  | Prostate surface irregularity |                           | 63.31         | 115.29       | 27.73       |
| 59  | "Droopy" seminal vesicles     |                           | 45.17         | 222.83       | 23.23       |
| 60  | Prostate hypertrophy          |                           | 96.76         | 162.70       | 18.09       |
| 61  | Prostate hypertrophy          |                           | 72.00         | 133.58       | 27.03       |
| 62  | Prostate hypertrophy          |                           | 53.57         | 129.84       | 18.80       |
| 63  | "Droopy" seminal vesicles     |                           | 96.04         | 71.08        | 56.81       |
| 64  | Normal                        |                           | 57.90         | 102.95       | 23.29       |
| 65  | Prostate hypertrophy          |                           | 111.19        | 433.62       | 28.72       |
| 66  | Prostate hypertrophy          |                           | 53.43         | 54.13        | 29.63       |
| 67  | Prostate hypertrophy          | "Droopy" seminal vesicles | 80.77         | 101.61       | 36.33       |
| 68  | Prostate hypertrophy          | "Droopy" seminal vesicles | 58.58         | 190.80       | 37.47       |
| 69  | Prostate hypertrophy          |                           | 92.16         | 174.26       | 39.31       |
| 70  | "Droopy" seminal vesicles     | Hip arthroplasty          | 47.16         | 61.65        | 36.02       |
| 71  | Hip arthroplasty              |                           | 90.71         | 44.90        | 22.70       |
| 72  | "Droopy" seminal vesicles     |                           | 52.89         | 78.49        | 44.91       |
| 73  | Normal                        |                           | 119.76        | 91.47        | 60.34       |
| 74  | Prostate hypertrophy          | Hip arthroplasty          | 53.61         | 71.37        | 30.28       |
| 75  | "Droopy" seminal vesicles     |                           | 57.35         | 234.30       | 59.89       |
| 76  | Prostate hypertrophy          |                           | 61.98         | 117.05       | 20.50       |
| 77  | Prostate hypertrophy          | "Droopy" seminal vesicles | 55.16         | 100.78       | 57.48       |
| 78  | Prostate surface irregularity |                           | 37.60         | 113.00       | 344.90      |
| 79  | Prostate hypertrophy          | "Droopy" seminal vesicles | 86.07         | 78.74        | 42.40       |
| 80  | Prostate hypertrophy          | "Droopy" seminal vesicles | 46.06         | 68.74        | 23.37       |
| 81  | "Droopy" seminal vesicles     |                           | 66.34         | 78.58        | 27.51       |
| 82  | Narrow rectum                 |                           | 46.42         | 237.03       | 20.67       |
| 83  | "Droopy" seminal vesicles     |                           | 75.60         | 251.43       | 32.94       |
| 84  | Seeds, calcifications         |                           | 61.97         | 105.69       | 29.04       |
| 85  | Prostate hypertrophy          |                           | 56.40         | 86.47        | 30.02       |
| 86  | Prostate surface irregularity |                           | 49.62         | 225.22       | 48.15       |
| 87  | "Droopy" seminal vesicles     |                           | 56.68         | 156.66       | 21.77       |
| 88  | Prostate hypertrophy          |                           | 120.75        | 69.87        | 40.62       |
| 89  | "Droopy" seminal vesicles     |                           | 80.14         | 160.11       | 25.38       |
| 90  | Prostate hypertrophy          |                           | 80.14         | 74.78        | 34.53       |
| 91  | Normal                        |                           | 35.49         | 177.41       | 28.45       |
| 92  | "Droopy" seminal vesicles     |                           | 79.89         | 83.01        | 32.89       |
| 93  | Prostate hypertrophy          |                           | 115.34        | 47.50        | 63.81       |
| 94  | "Droopy" seminal vesicles     |                           | 125.60        | 85.65        | 30.66       |
| 95  | "Droopy" seminal vesicles     | Hip arthroplasty          | 99.86         | 205.13       | 32.37       |
| 96  | "Droopy" seminal vesicles     |                           | 55.14         | 51.55        | 28.99       |
| 97  | Seeds, calcifications         |                           | 60.37         | 122.13       | 22.93       |
| 98  | Prostate hypertrophy          |                           | 125.48        | 192.96       | 32.06       |
| 99  | Prostate hypertrophy          |                           | 63.87         | 123.79       | 23.54       |
| 100 | Prostate hypertrophy          |                           | 42.35         | 86.08        | 23.18       |
| 101 | "Droopy" seminal vesicles     |                           | 63.97         | 249.39       | 283.74      |
| 102 | Normal                        |                           | 54.55         | 44.09        | 28.60       |
| 103 | Hip arthroplasty              |                           | 43.66         | 53.83        | 37.27       |
| 104 | Prostate hypertrophy          | "Droopy" seminal vesicles | 73.62         | 54.44        | 44.95       |
| 105 | Prostate hypertrophy          |                           | 51.00         | 74.35        | 27.98       |
| 106 | Prostate hypertrophy          |                           | 42.55         | 56.43        | 48.48       |
| 107 | Prostate hypertrophy          |                           | 65.90         | 171.13       | 23.05       |
| 108 | Prostate hypertrophy          |                           | 81.56         | 93.68        | 20.76       |
| 109 | Normal                        |                           | 31.92         | 130.16       | 42.33       |
| 110 | Normal                        |                           | 62.22         | 246.52       | 86.16       |
| 111 | Normal                        |                           | 66.95         | 133.91       | 87.26       |
| 112 | Normal                        |                           | 64.31         | 99.51        | 22.67       |
| 113 | Normal                        |                           | 50.20         | 258.12       | 41.15       |
| 114 | Normal                        |                           | 61.68         | 272.42       | 54.52       |
| 115 | SpaceOAR                      |                           | 60.85         | 689.82       | 67.81       |
| 116 | Normal                        |                           | 66.84         | 209.13       | 53.23       |
| 117 | Normal                        |                           | 35.36         | 76.36        | 56.43       |
| 118 | Normal                        |                           | 30.29         | 178.50       | 21.07       |
| 119 | Prostate hypertrophy          |                           | 98.91         | 630.80       | 40.11       |
| 120 | Normal                        |                           | 40.18         | 177.30       | 67.20       |
| 121 | SpaceOAR                      |                           | 109.66        | 143.22       | 57.21       |
| 122 | SpaceOAR                      |                           | 43.47         | 204.03       | 29.81       |
| 123 | Prostate hypertrophy          |                           | 53.08         | 98.81        | 136.07      |
| 124 | Normal                        |                           | 27.20         | 281.91       | 34.15       |
| 125 | Normal                        |                           | 41.13         | 375.57       | 48.68       |
| 126 | Normal                        |                           | 50.91         | 216.65       | 45.31       |
| 127 | Prostate hypertrophy          |                           | 153.81        | 174.37       | 73.21       |
| 128 | Morbid obesity                |                           | 88.43         | 180.12       | 51.52       |
| 129 | Normal                        |                           | 42.12         | 113.28       | 67.47       |
| 130 | SpaceOAR                      |                           | 52.58         | 130.23       | 109.78      |
| 131 | Foley catheter                | Prostate hypertrophy      | 145.63        | 140.90       | 24.60       |

**Supplementary Table 3. Detailed list of structure comparisons per individual for prostate, rectum, bladder, and bilateral femoral heads (femur\_L, femur\_R). Comparisons all versus expert clinician-delineated contours via Dice similarity coefficient (DSC). Results are for model-based (MB), deep learning (DL), and atlas-based (AB) algorithms.**

| ID | Prostate |      |      | Rectum |      |      | Bladder |      |      | Femur_L |      |      | Femur_R |      |      |
|----|----------|------|------|--------|------|------|---------|------|------|---------|------|------|---------|------|------|
|    | MB       | DL   | AB   | MB     | DL   | AB   | MB      | DL   | AB   | MB      | DL   | AB   | MB      | DL   | AB   |
| 1  | 0.07     | 0.86 | 0.57 | 0.10   | 0.55 | 0.52 | 0.11    | 0.95 | 0.95 | 0.10    | 0.92 | 0.96 | 0.32    | 0.90 | 0.95 |
| 2  | 0.03     | 0.82 | 0.71 | 0.16   | 0.47 | NA   | 0.22    | 0.93 | 0.64 | 0.89    | 0.95 | 0.93 | 0.94    | 0.93 | 0.95 |
| 3  | 0.63     | 0.81 | 0.52 | 0.40   | 0.47 | 0.41 | 0.48    | 0.88 | 0.58 | 0.91    | 0.96 | 0.95 | 0.95    | 0.92 | 0.96 |
| 4  | 0.86     | 0.91 | 0.41 | 0.47   | 0.66 | 0.68 | 0.94    | 0.96 | 0.85 | 0.93    | 0.92 | 0.94 | 0.96    | 0.90 | 0.95 |
| 5  | 0.64     | 0.72 | 0.00 | 0.48   | 0.63 | 0.42 | 0.85    | 0.93 | NA   | 0.91    | 0.85 | 0.27 | 0.90    | 0.84 | 0.04 |
| 6  | 0.47     | 0.51 | 0.47 | 0.31   | 0.33 | 0.31 | 0.52    | 0.91 | 0.47 | 0.89    | 0.95 | 0.94 | 0.93    | 0.92 | 0.92 |
| 7  | 0.46     | 0.82 | NA   | 0.65   | 0.68 | 0.52 | 0.27    | 0.91 | NA   | 0.95    | 0.90 | 0.78 | 0.96    | 0.87 | 0.28 |
| 8  | 0.65     | 0.73 | 0.38 | 0.28   | 0.66 | 0.51 | 0.91    | 0.86 | 0.84 | 0.93    | 0.91 | 0.93 | 0.94    | 0.91 | 0.93 |
| 9  | 0.75     | 0.84 | 0.47 | 0.17   | 0.38 | 0.37 | 0.96    | 0.98 | 0.87 | 0.82    | 0.72 | 0.79 | 0.83    | 0.73 | 0.82 |
| 10 | NA       | NA   | 0.42 | NA     | NA   | 0.31 | NA      | NA   | 0.24 | NA      | NA   | 0.94 | NA      | NA   | NA   |
| 11 | 0.76     | 0.84 | 0.44 | 0.56   | 0.62 | 0.52 | 0.93    | 0.92 | 0.73 | 0.91    | 0.91 | 0.94 | 0.94    | 0.89 | 0.93 |
| 12 | 0.21     | 0.61 | 0.25 | 0.40   | 0.52 | 0.43 | 0.12    | 0.66 | NA   | 0.87    | 0.78 | 0.80 | NA      | NA   | NA   |
| 13 | 0.68     | 0.82 | 0.00 | 0.44   | 0.55 | 0.11 | 0.32    | 0.86 | NA   | 0.94    | 0.91 | 0.00 | 0.91    | 0.86 | 0.00 |
| 14 | 0.28     | 0.24 | 0.34 | 0.19   | 0.22 | 0.54 | 0.05    | 0.05 | 0.90 | 0.50    | 0.47 | 0.92 | 0.57    | 0.54 | 0.94 |
| 15 | 0.68     | 0.84 | 0.76 | 0.50   | 0.70 | 0.52 | 0.95    | 0.95 | 0.71 | 0.90    | 0.92 | 0.53 | 0.96    | 0.89 | 0.81 |
| 16 | 0.75     | 0.83 | 0.00 | 0.41   | 0.56 | 0.31 | 0.82    | 0.92 | NA   | 0.96    | 0.93 | 0.54 | 0.91    | 0.88 | 0.38 |
| 17 | 0.70     | 0.74 | 0.55 | 0.17   | 0.31 | 0.33 | 0.92    | 0.92 | 0.56 | 0.93    | 0.96 | 0.94 | 0.97    | 0.89 | 0.95 |
| 18 | 0.71     | 0.76 | 0.18 | 0.41   | 0.73 | NA   | 0.94    | 0.94 | 0.62 | 0.93    | 0.91 | 0.91 | 0.89    | 0.87 | 0.90 |
| 19 | 0.79     | 0.80 | 0.46 | 0.36   | 0.62 | 0.45 | 0.90    | 0.94 | 0.84 | 0.95    | 0.89 | 0.90 | 0.96    | 0.89 | 0.95 |
| 20 | 0.69     | 0.88 | 0.58 | 0.45   | 0.57 | 0.48 | 0.56    | 0.95 | 0.87 | 0.56    | 0.70 | 0.45 | 0.91    | 0.85 | 0.91 |
| 21 | 0.76     | 0.82 | 0.58 | 0.13   | 0.56 | 0.47 | 0.95    | 0.91 | 0.90 | 0.86    | 0.95 | 0.92 | 0.90    | 0.95 | 0.92 |
| 22 | 0.57     | 0.70 | 0.00 | 0.36   | 0.64 | 0.00 | 0.25    | 0.57 | NA   | 0.91    | 0.93 | 0.00 | 0.91    | 0.94 | NA   |
| 23 | 0.82     | 0.73 | NA   | 0.25   | 0.64 | 0.00 | 0.46    | 0.78 | NA   | 0.92    | 0.95 | 0.38 | 0.95    | 0.93 | 0.20 |
| 24 | 0.81     | 0.84 | 0.00 | 0.39   | 0.40 | 0.00 | 0.83    | 0.90 | NA   | 0.90    | 0.94 | 0.00 | 0.92    | 0.96 | 0.00 |
| 25 | 0.52     | 0.83 | NA   | 0.44   | 0.51 | NA   | 0.74    | 0.92 | NA   | 0.84    | 0.74 | 0.82 | 0.79    | 0.75 | 0.50 |
| 26 | 0.32     | NA   | 0.00 | 0.29   | NA   | 0.18 | 0.34    | NA   | NA   | 0.94    | NA   | 0.00 | NA      | NA   | NA   |
| 27 | 0.33     | 0.68 | 0.44 | 0.33   | 0.59 | 0.41 | 0.00    | 0.86 | 0.47 | 0.94    | 0.89 | 0.93 | 0.94    | 0.87 | 0.93 |
| 28 | 0.09     | 0.00 | 0.25 | 0.28   | 0.54 | 0.32 | 0.70    | 0.56 | 0.63 | 0.34    | 0.47 | 0.30 | 0.20    | 0.09 | 0.14 |
| 29 | 0.59     | 0.56 | 0.51 | 0.75   | 0.79 | 0.63 | 0.91    | 0.92 | 0.81 | 0.87    | 0.95 | 0.92 | 0.94    | 0.94 | 0.94 |
| 30 | 0.58     | 0.67 | 0.31 | 0.56   | 0.55 | 0.35 | 0.90    | 0.96 | 0.91 | 0.88    | 0.94 | 0.93 | 0.91    | 0.95 | 0.94 |
| 31 | 0.50     | 0.76 | 0.46 | 0.39   | 0.53 | 0.50 | 0.96    | 0.95 | 0.92 | 0.95    | 0.87 | 0.92 | 0.94    | 0.86 | 0.93 |
| 32 | 0.38     | 0.88 | 0.73 | 0.37   | 0.43 | 0.40 | 0.06    | 0.97 | 0.79 | 0.84    | 0.93 | 0.90 | 0.86    | 0.96 | 0.86 |
| 33 | 0.63     | 0.85 | 0.00 | 0.32   | 0.52 | NA   | 0.58    | 0.94 | NA   | 0.92    | 0.90 | 0.00 | 0.95    | 0.86 | NA   |
| 34 | 0.46     | 0.76 | 0.63 | 0.25   | 0.32 | 0.35 | 0.96    | 0.94 | 0.71 | 0.77    | 0.70 | 0.73 | 0.78    | 0.69 | 0.77 |
| 35 | 0.17     | 0.67 | 0.23 | 0.40   | 0.32 | 0.30 | 0.01    | 0.87 | NA   | 0.09    | 0.27 | 0.23 | 0.96    | 0.89 | 0.93 |
| 36 | 0.65     | 0.35 | 0.24 | 0.45   | 0.62 | 0.57 | 0.59    | 0.40 | 0.46 | 0.93    | 0.83 | 0.88 | 0.89    | 0.81 | 0.87 |
| 37 | 0.02     | 0.73 | 0.00 | 0.20   | 0.56 | 0.43 | 0.96    | 0.95 | 0.08 | 0.88    | 0.93 | 0.88 | 0.91    | 0.94 | 0.71 |
| 38 | 0.53     | 0.85 | 0.65 | 0.51   | 0.67 | 0.33 | 0.43    | 0.88 | 0.43 | 0.90    | 0.90 | 0.77 | 0.95    | 0.90 | 0.80 |
| 39 | 0.73     | 0.83 | 0.54 | 0.40   | 0.53 | 0.41 | 0.94    | 0.89 | 0.93 | 0.96    | 0.94 | 0.92 | 0.94    | 0.87 | 0.93 |
| 40 | 0.50     | 0.53 | 0.00 | 0.08   | 0.35 | NA   | 0.91    | 0.70 | 0.00 | 0.84    | 0.75 | 0.00 | 0.81    | 0.77 | 0.00 |
| 41 | 0.08     | 0.79 | 0.00 | 0.34   | 0.50 | NA   | 0.29    | 0.87 | 0.00 | 0.92    | 0.93 | 0.00 | 0.96    | 0.90 | 0.00 |
| 42 | 0.39     | 0.81 | 0.75 | 0.62   | 0.38 | 0.29 | 0.54    | 0.84 | 0.45 | 0.96    | 0.88 | 0.89 | 0.91    | 0.86 | 0.88 |
| 43 | 0.00     | 0.00 | 0.53 | 0.00   | 0.00 | NA   | 0.00    | 0.00 | 0.48 | 0.00    | 0.00 | 0.90 | 0.00    | 0.00 | 0.89 |
| 44 | 0.09     | 0.87 | 0.65 | 0.10   | 0.37 | 0.26 | 0.75    | 0.95 | 0.93 | 0.87    | 0.91 | 0.94 | 0.95    | 0.89 | 0.95 |
| 45 | 0.17     | 0.85 | 0.53 | 0.39   | 0.44 | 0.42 | 0.67    | 0.95 | 0.81 | 0.93    | 0.89 | 0.95 | 0.95    | 0.88 | 0.96 |
| 46 | 0.41     | 0.72 | 0.51 | 0.10   | 0.23 | 0.29 | 0.84    | 0.88 | 0.75 | 0.80    | 0.73 | 0.80 | 0.71    | 0.66 | 0.75 |
| 47 | 0.47     | 0.84 | 0.59 | 0.59   | 0.68 | 0.62 | 0.94    | 0.94 | 0.94 | 0.96    | 0.88 | 0.90 | 0.95    | 0.87 | 0.93 |
| 48 | 0.51     | 0.79 | 0.45 | 0.16   | 0.46 | 0.38 | 0.53    | 0.95 | 0.69 | 0.91    | 0.90 | 0.94 | 0.94    | 0.90 | 0.94 |
| 49 | 0.11     | 0.00 | 0.21 | 0.12   | 0.28 | 0.25 | 0.37    | 0.41 | 0.64 | 0.08    | 0.11 | 0.10 | 0.17    | 0.08 | 0.11 |
| 50 | 0.31     | 0.73 | 0.53 | 0.37   | 0.62 | 0.43 | 0.79    | 0.93 | 0.81 | 0.88    | 0.95 | 0.85 | 0.96    | 0.96 | 0.85 |
| 51 | 0.75     | 0.64 | 0.42 | 0.47   | 0.49 | 0.43 | 0.96    | 0.98 | 0.96 | 0.93    | 0.92 | 0.93 | 0.96    | 0.88 | 0.94 |
| 52 | 0.10     | 0.85 | 0.68 | 0.20   | 0.55 | NA   | 0.80    | 0.96 | 0.76 | 0.88    | 0.77 | 0.81 | 0.78    | 0.70 | 0.77 |
| 53 | 0.73     | 0.84 | 0.65 | 0.29   | 0.36 | 0.33 | 0.96    | 0.97 | 0.95 | 0.82    | 0.73 | 0.76 | 0.79    | 0.72 | 0.78 |
| 54 | 0.00     | 0.78 | 0.67 | 0.22   | 0.64 | 0.53 | 0.06    | 0.85 | 0.43 | 0.95    | 0.87 | 0.90 | 0.94    | 0.88 | 0.86 |
| 55 | 0.00     | 0.75 | 0.62 | 0.49   | 0.77 | 0.55 | 0.73    | 0.97 | 0.88 | 0.89    | 0.95 | 0.94 | 0.94    | 0.92 | 0.95 |
| 56 | 0.72     | 0.72 | 0.52 | 0.53   | 0.62 | 0.54 | 0.94    | 0.95 | 0.93 | 0.88    | 0.91 | 0.95 | 0.94    | 0.88 | 0.95 |
| 57 | NA       | NA   | NA   | 0.43   | 0.69 | 0.61 | 0.93    | 0.92 | 0.75 | 0.96    | 0.94 | 0.91 | 0.93    | 0.89 | 0.82 |
| 58 | NA       | NA   | 0.63 | NA     | NA   | 0.53 | NA      | NA   | 0.57 | NA      | NA   | 0.96 | NA      | NA   | 0.95 |
| 59 | 0.46     | 0.83 | 0.57 | 0.41   | 0.56 | 0.48 | 0.97    | 0.96 | 0.92 | 0.91    | 0.80 | 0.83 | 0.86    | 0.78 | 0.83 |
| 60 | 0.00     | 0.00 | 0.60 | 0.00   | 0.00 | 0.34 | 0.00    | 0.00 | 0.81 | 0.00    | 0.00 | 0.94 | 0.00    | 0.00 | 0.94 |
| 61 | 0.73     | 0.80 | NA   | 0.37   | 0.53 | 0.46 | 0.96    | 0.92 | NA   | 0.92    | 0.92 | 0.85 | 0.94    | 0.93 | 0.86 |
| 62 | 0.83     | 0.89 | 0.68 | 0.35   | 0.43 | 0.39 | 0.67    | 0.91 | 0.60 | 0.92    | 0.92 | 0.95 | 0.95    | 0.90 | 0.93 |
| 63 | 0.68     | 0.79 | 0.62 | 0.42   | 0.52 | 0.49 | 0.03    | 0.82 | 0.49 | 0.96    | 0.90 | 0.91 | 0.93    | 0.86 | 0.90 |
| 64 | 0.79     | 0.80 | 0.50 | 0.46   | 0.57 | 0.56 | 0.91    | 0.94 | 0.87 | 0.91    | 0.91 | 0.93 | 0.97    | 0.88 | 0.94 |
| 65 | 0.20     | 0.76 | 0.09 | 0.20   | 0.53 | 0.38 | 0.56    | 0.97 | 0.57 | 0.87    | 0.96 | 0.89 | 0.90    | 0.93 | 0.87 |
| 66 | 0.55     | 0.83 | 0.56 | 0.40   | 0.51 | 0.54 | 0.31    | 0.93 | 0.61 | 0.91    | 0.93 | 0.95 | 0.91    | 0.93 | 0.91 |
| 67 | 0.39     | 0.86 | 0.70 | 0.41   | 0.49 | 0.47 | 0.64    | 0.91 | 0.71 | 0.96    | 0.92 | 0.92 | 0.94    | 0.91 | 0.94 |
| 68 | 0.77     | 0.76 | 0.55 | 0.45   | 0.61 | 0.55 | 0.64    | 0.94 | 0.26 | 0.93    | 0.93 | 0.89 | 0.90    | 0.84 | 0.88 |
| 69 | 0.37     | 0.47 | 0.16 | 0.48   | 0.29 | 0.17 | 0.66    | 0.84 | 0.70 | 0.78    | 0.77 | 0.76 | 0.80    | 0.77 | 0.80 |
| 70 | 0.28     | 0.00 | 0.59 | 0.25   | 0.53 | 0.40 | 0.29    | 0.00 | 0.19 | 0.17    | 0.41 | 0.18 | 0.49    | 0.26 | 0.36 |
| 71 | 0.81     | 0.58 | 0.27 | 0.38   | 0.40 | 0.35 | 0.14    | 0.85 | 0.74 | 0.45    | 0.59 | 0.56 | 0.94    | 0.88 | 0.93 |
| 72 | 0.80     | 0.88 | 0.73 | 0.31   | 0.70 | 0.50 | 0.59    | 0.91 | 0.53 | 0.88    | 0.92 | 0.92 | 0.91    | 0.86 | 0.91 |
| 73 | 0.10     | 0.45 | 0.32 | 0.42   | 0.63 | NA   | 0.64    | 0.79 | 0.54 | 0.94    | 0.85 | 0.89 | 0.93    | 0.87 | 0.92 |
| 74 | 0.64     | 0.36 | 0.41 | 0.18   | 0.45 | 0.19 | 0.22    | 0.00 | 0.39 | 0.21    | 0.47 | 0.26 | 0.52    | 0.61 | 0.50 |
| 75 | 0.76     | 0.77 | 0.57 | 0.39   | 0.58 | 0.56 | 0.77    | 0.88 | 0.80 | 0.93    | 0.95 | 0.91 | 0.96    | 0.90 | 0.92 |
| 76 | 0.53     | 0.78 | 0.62 | 0.45   | 0.59 | 0.41 | 0.91    | 0.90 | 0.55 | 0.96    | 0.93 | 0.88 | 0.95    | 0.94 | 0.92 |
| 77 | 0.46     | 0.79 | 0.60 | 0.60   | 0.65 | 0.48 | 0.68    | 0.89 | 0.62 | 0.96    | 0.90 | 0.92 | 0.96    | 0.91 | 0.92 |
| 78 | 0.45     | 0.81 | 0.00 | 0.19   | 0.61 | 0.47 | 0.31    | 0.91 | 0.00 | 0.91    | 0.89 | 0.00 | 0.93    | 0.88 | 0.00 |
| 79 | 0.20     | 0.85 | 0.46 | 0.29   | 0.66 | 0.33 | 0.22    | 0.91 | 0.33 | 0.90    | 0.95 | 0.94 | 0.97    | 0.93 | 0.95 |
| 80 | 0.63     | 0.77 | 0.53 | 0.16   | 0.35 | 0.36 | 0.29    | 0.86 | 0.67 | 0.95    | 0.90 | 0.94 | 0.97    | 0.91 | 0.97 |
| 81 | 0.75     | 0.73 | 0.43 | 0.41   | 0.43 | 0.52 | 0.77    | 0.84 | 0.83 | 0.90    | 0.92 | 0.93 | 0.94    | 0.87 | 0.92 |
| 82 | 0.13     | 0.74 | 0.66 | 0.44   | 0.37 | 0.36 | 0.33    | 0.96 | 0.97 | 0.95    | 0.90 | 0.95 | 0.97    | 0.89 | 0.96 |
| 83 | 0.80     | 0.87 | 0.63 | 0.47   | 0.51 | 0.54 | 0.96    | 0.94 | 0.93 | 0.90    | 0.95 | 0.95 | 0.95    | 0.91 | 0.95 |
| 84 | 0.64     | 0.84 | 0.6  |        |      |      |         |      |      |         |      |      |         |      |      |



**Supplementary Table 4. Detailed list of structure comparisons per individual for prostate, rectum, bladder, and bilateral femoral heads (femur\_L, femur\_R). Comparisons all versus clinician-delineated contours via Mean surface distance (MSD) in millimeters. Results are for model-based (MB), deep learning (DL), and atlas-based (AB) algorithms.**

| ID | Prostate |       |        | Rectum |       |        | Bladder |        |        | Femur_L |       |        | Femur_R |       |       |
|----|----------|-------|--------|--------|-------|--------|---------|--------|--------|---------|-------|--------|---------|-------|-------|
|    | MB       | DL    | AB     | MB     | DL    | AB     | MB      | DL     | AB     | MB      | DL    | AB     | MB      | DL    | AB    |
| 1  | 21.44    | 2.34  | 6.01   | 18.94  | 8.04  | 11.30  | 22.83   | 1.40   | 1.46   | 19.63   | 1.42  | 0.83   | 15.40   | 1.67  | 1.00  |
| 2  | 18.83    | 3.01  | 4.03   | 13.94  | 8.47  | NA     | 14.70   | 2.02   | 16.04  | 2.32    | 1.07  | 1.34   | 1.37    | 1.32  | 1.17  |
| 3  | 5.50     | 2.52  | 5.09   | 7.31   | 10.81 | 15.65  | 6.99    | 2.51   | 13.87  | 1.82    | 0.96  | 0.93   | 1.28    | 1.48  | 0.85  |
| 4  | 3.34     | 2.20  | 9.40   | 9.37   | 7.14  | 7.90   | 1.89    | 1.57   | 5.06   | 1.51    | 1.72  | 1.59   | 1.27    | 2.02  | 1.28  |
| 5  | 5.63     | 4.15  | 62.33  | 11.53  | 6.57  | 9.57   | 2.63    | 1.82   | NA     | 1.55    | 3.06  | 9.73   | 1.61    | 3.83  | 19.72 |
| 6  | 11.71    | 8.84  | 9.31   | 9.66   | 14.95 | 21.76  | 11.77   | 2.27   | 9.63   | 2.50    | 0.95  | 0.90   | 1.46    | 1.38  | 1.22  |
| 7  | 14.14    | 4.13  | NA     | 4.30   | 4.82  | 12.86  | 13.72   | 2.20   | NA     | 1.27    | 2.18  | 5.07   | 1.09    | 3.76  | 11.48 |
| 8  | 6.37     | 4.48  | 9.42   | 15.43  | 5.88  | 9.80   | 1.89    | 3.01   | 3.60   | 1.48    | 1.85  | 1.46   | 1.27    | 1.96  | 1.55  |
| 9  | 3.75     | 2.57  | 6.27   | 14.66  | 11.93 | 13.58  | 1.58    | 1.12   | 3.28   | 2.79    | 9.47  | 6.31   | 2.85    | 9.27  | 4.87  |
| 10 | NA       | NA    | 5.65   | NA     | NA    | 17.55  | NA      | NA     | 24.81  | NA      | NA    | 1.09   | NA      | NA    | NA    |
| 11 | 4.58     | 3.00  | 8.06   | 6.08   | 6.17  | 8.74   | 1.52    | 1.71   | 6.76   | 1.49    | 1.37  | 1.05   | 1.12    | 1.71  | 1.20  |
| 12 | 16.11    | 4.82  | 9.59   | 12.26  | 14.27 | 12.11  | 28.86   | 11.74  | NA     | 2.17    | 5.17  | 6.50   | NA      | NA    | NA    |
| 13 | 4.78     | 2.90  | 124.63 | 9.52   | 10.31 | 38.95  | 17.50   | 3.06   | NA     | 1.27    | 1.56  | 65.08  | 1.56    | 2.93  | 71.73 |
| 14 | 18.56    | 20.81 | 12.65  | 12.98  | 12.73 | 6.03   | 28.74   | 28.93  | 3.54   | 8.59    | 9.35  | 1.55   | 7.78    | 9.08  | 1.24  |
| 15 | 7.06     | 3.52  | 3.83   | 9.22   | 7.35  | 12.67  | 1.75    | 1.67   | 22.10  | 2.07    | 1.56  | 9.81   | 1.03    | 1.88  | 2.88  |
| 16 | 3.50     | 2.59  | 121.34 | 9.81   | 11.96 | 15.60  | 3.26    | 2.02   | NA     | 1.24    | 1.32  | 14.67  | 1.62    | 2.21  | 10.00 |
| 17 | 4.58     | 3.42  | 5.10   | 22.05  | 17.49 | 17.98  | 1.89    | 1.96   | 21.37  | 1.41    | 1.05  | 1.15   | 1.07    | 2.27  | 0.93  |
| 18 | 4.47     | 3.79  | 10.55  | 12.39  | 5.57  | NA     | 1.92    | 1.96   | 6.17   | 1.62    | 1.59  | 1.78   | 1.84    | 2.71  | 2.10  |
| 19 | 3.76     | 3.52  | 8.09   | 8.83   | 4.88  | 13.80  | 2.28    | 1.77   | 3.98   | 1.18    | 1.86  | 1.84   | 1.01    | 1.98  | 1.06  |
| 20 | 5.52     | 2.23  | 5.53   | 12.06  | 9.82  | 16.20  | 10.29   | 1.75   | 3.35   | 19.42   | 10.80 | 12.09  | 1.62    | 3.47  | 1.84  |
| 21 | 4.05     | 3.26  | 5.97   | 23.23  | 8.79  | 6.97   | 1.40    | 2.01   | 3.56   | 4.44    | 1.13  | 1.24   | 2.78    | 1.14  | 1.21  |
| 22 | 7.07     | 5.77  | 125.06 | 12.03  | 5.98  | 101.68 | 19.25   | 6.34   | NA     | 1.86    | 1.49  | 97.61  | 1.83    | 1.52  | NA    |
| 23 | 3.63     | 4.50  | NA     | 17.17  | 6.48  | 89.74  | 12.58   | 4.59   | NA     | 1.63    | 1.22  | 8.98   | 1.24    | 1.27  | 19.40 |
| 24 | 2.67     | 2.31  | 129.92 | 12.50  | 13.22 | 98.24  | 2.91    | 1.85   | NA     | 2.41    | 1.25  | 48.50  | 1.78    | 1.24  | 62.42 |
| 25 | 8.39     | 3.10  | NA     | 9.57   | 14.96 | NA     | 4.79    | 1.80   | NA     | 2.29    | 6.89  | 3.33   | 3.51    | 5.77  | 8.87  |
| 26 | 13.38    | NA    | 125.54 | 13.98  | NA    | 31.64  | 12.58   | NA     | NA     | 1.26    | NA    | 81.29  | NA      | NA    | NA    |
| 27 | 10.74    | 3.85  | 6.13   | 14.20  | 10.74 | 21.68  | 25.99   | 2.92   | 16.31  | 1.32    | 2.23  | 1.44   | 1.19    | 2.65  | 1.42  |
| 28 | 19.94    | 30.00 | 11.23  | 14.65  | 9.71  | 13.75  | 6.44    | 9.48   | 4.98   | 22.17   | 13.28 | 16.76  | 46.41   | 20.87 | 33.98 |
| 29 | 9.47     | 7.62  | 8.24   | 3.99   | 3.77  | 6.19   | 2.41    | 2.26   | 6.38   | 2.74    | 1.32  | 1.68   | 1.51    | 1.46  | 1.40  |
| 30 | 6.32     | 5.35  | 10.17  | 7.12   | 6.85  | 12.98  | 2.72    | 1.35   | 2.55   | 2.48    | 1.25  | 1.20   | 1.65    | 1.31  | 1.12  |
| 31 | 9.73     | 3.88  | 8.66   | 11.95  | 9.59  | 12.56  | 1.53    | 1.56   | 2.64   | 1.30    | 2.74  | 1.72   | 1.37    | 3.49  | 1.47  |
| 32 | 11.92    | 2.34  | 3.90   | 10.21  | 12.81 | 14.81  | 40.74   | 1.32   | 4.63   | 5.05    | 1.52  | 1.63   | 4.28    | 1.01  | 2.30  |
| 33 | 5.24     | 2.13  | 155.40 | 9.99   | 8.57  | NA     | 9.63    | 1.80   | NA     | 1.59    | 1.90  | 182.68 | 1.36    | 3.19  | NA    |
| 34 | 10.08    | 3.71  | 5.14   | 19.47  | 17.28 | 20.76  | 1.33    | 1.60   | 13.03  | 3.75    | 8.43  | 9.06   | 3.73    | 10.10 | 6.98  |
| 35 | 21.38    | 4.71  | 9.18   | 10.07  | 16.06 | 14.58  | 33.94   | 2.74   | NA     | 12.58   | 12.61 | 13.13  | 1.20    | 2.34  | 1.56  |
| 36 | 7.61     | 10.59 | 15.00  | 10.19  | 7.16  | 9.70   | 6.73    | 13.54  | 15.27  | 1.25    | 4.06  | 2.75   | 1.79    | 5.05  | 3.50  |
| 37 | 26.08    | 4.56  | 50.09  | 22.86  | 14.06 | 18.82  | 1.57    | 1.69   | 23.42  | 2.50    | 1.34  | 1.75   | 1.84    | 1.22  | 4.27  |
| 38 | 5.99     | 2.16  | 5.29   | 7.72   | 5.56  | 17.91  | 11.12   | 2.91   | 12.56  | 1.78    | 1.51  | 3.93   | 1.15    | 1.67  | 3.67  |
| 39 | 3.56     | 2.48  | 5.13   | 12.09  | 9.77  | 15.45  | 1.38    | 2.10   | 1.43   | 1.18    | 1.27  | 1.75   | 1.24    | 2.97  | 1.44  |
| 40 | 11.15    | 5.74  | 120.90 | 20.91  | 13.28 | NA     | 1.73    | 5.68   | 115.96 | 2.30    | 6.05  | 61.26  | 3.32    | 5.17  | 54.08 |
| 41 | 25.52    | 2.82  | 141.90 | 18.22  | 13.93 | NA     | 21.89   | 2.60   | 139.11 | 1.44    | 1.32  | 51.76  | 1.09    | 1.99  | 55.34 |
| 42 | 9.28     | 2.74  | 2.97   | 5.03   | 13.79 | 25.84  | 11.52   | 3.13   | 17.80  | 1.12    | 2.34  | 2.62   | 1.41    | 2.48  | 2.73  |
| 43 | 7.21     | 4.15  | 4.74   | 18.28  | 10.47 | NA     | 6.19    | 2.71   | 19.28  | 4.01    | 1.20  | 1.59   | 1.86    | 1.13  | 1.82  |
| 44 | 20.87    | 2.15  | 4.57   | 17.76  | 11.41 | 15.65  | 7.06    | 1.66   | 2.55   | 2.61    | 1.54  | 1.05   | 1.09    | 1.85  | 1.03  |
| 45 | 17.32    | 2.62  | 6.89   | 7.72   | 11.57 | 12.33  | 7.96    | 1.41   | 6.36   | 1.37    | 1.93  | 1.06   | 1.08    | 2.20  | 0.99  |
| 46 | 6.46     | 2.83  | 6.64   | 23.27  | 16.99 | 22.37  | 2.74    | 2.46   | 8.00   | 2.31    | 6.15  | 5.54   | 4.16    | 8.46  | 7.31  |
| 47 | 8.16     | 2.59  | 4.95   | 7.85   | 8.29  | 12.50  | 1.64    | 1.97   | 2.29   | 1.13    | 2.25  | 1.96   | 1.21    | 2.96  | 1.56  |
| 48 | 8.47     | 3.23  | 7.36   | 22.03  | 13.20 | 27.41  | 10.35   | 1.84   | 11.64  | 1.65    | 2.06  | 1.37   | 1.39    | 2.21  | 1.13  |
| 49 | 15.13    | 38.52 | 8.58   | 21.28  | 25.93 | 27.43  | 14.37   | 12.74  | 8.02   | 13.27   | 13.20 | 13.72  | 6.82    | 16.65 | 12.81 |
| 50 | 14.12    | 4.54  | 6.39   | 14.14  | 8.21  | 23.55  | 4.09    | 1.86   | 11.21  | 2.33    | 1.19  | 2.62   | 1.19    | 1.04  | 2.82  |
| 51 | 7.25     | 9.63  | 11.90  | 6.46   | 8.70  | 10.50  | 1.97    | 1.26   | 1.39   | 1.48    | 1.63  | 1.51   | 1.20    | 2.98  | 1.31  |
| 52 | 19.44    | 2.67  | 4.45   | 21.31  | 9.82  | NA     | 5.92    | 1.89   | 9.25   | 2.10    | 7.54  | 5.06   | 4.07    | 11.19 | 6.61  |
| 53 | 3.64     | 2.20  | 3.90   | 15.55  | 13.99 | 18.93  | 1.28    | 1.09   | 1.41   | 2.72    | 7.25  | 8.46   | 3.57    | 8.32  | 7.27  |
| 54 | 29.69    | 3.15  | 3.99   | 17.76  | 7.32  | 12.42  | 41.04   | 2.59   | 25.77  | 1.11    | 2.37  | 2.11   | 1.14    | 2.36  | 3.67  |
| 55 | 43.45    | 4.04  | 5.09   | 7.53   | 6.22  | 8.19   | 8.79    | 1.25   | 3.28   | 2.60    | 0.86  | 0.94   | 1.18    | 1.51  | 0.82  |
| 56 | 5.64     | 4.83  | 6.90   | 10.32  | 9.01  | 16.28  | 1.76    | 1.62   | 1.66   | 2.58    | 1.75  | 1.22   | 1.48    | 2.94  | 1.20  |
| 57 | NA       | NA    | NA     | 10.62  | 6.02  | 10.33  | 1.66    | 1.75   | 6.76   | 1.19    | 1.19  | 1.79   | 1.33    | 2.14  | 2.88  |
| 58 | NA       | NA    | 4.95   | NA     | NA    | 11.59  | NA      | NA     | 27.47  | NA      | NA    | 1.08   | NA      | NA    | 1.17  |
| 59 | 7.63     | 2.72  | 4.50   | 11.21  | 8.54  | 15.50  | 1.33    | 1.63   | 2.05   | 1.43    | 4.90  | 4.76   | 2.30    | 5.70  | 4.66  |
| 60 | 3.25     | 2.18  | 5.23   | 23.87  | 16.42 | 16.84  | 1.55    | 1.84   | 3.89   | 1.75    | 2.52  | 1.52   | 1.29    | 3.92  | 1.46  |
| 61 | 4.05     | 3.22  | NA     | 9.92   | 6.71  | 8.41   | 1.50    | 1.95   | NA     | 1.46    | 1.50  | 2.29   | 1.29    | 1.35  | 1.83  |
| 62 | 2.49     | 1.86  | 3.77   | 10.06  | 12.21 | 18.52  | 8.11    | 2.02   | 16.82  | 1.54    | 1.66  | 1.00   | 1.15    | 2.17  | 1.10  |
| 63 | 5.59     | 3.43  | 5.34   | 10.98  | 11.49 | 12.58  | 19.80   | 2.96   | 13.59  | 1.19    | 1.92  | 1.83   | 1.45    | 3.28  | 2.26  |
| 64 | 3.03     | 3.02  | 6.05   | 11.38  | 9.11  | 12.77  | 1.87    | 1.62   | 2.70   | 1.94    | 1.82  | 1.49   | 1.14    | 2.94  | 1.33  |
| 65 | 18.41    | 4.42  | 18.88  | 15.80  | 8.72  | 15.85  | 14.92   | 1.26   | 8.68   | 3.13    | 0.98  | 1.90   | 2.15    | 1.43  | 2.18  |
| 66 | 6.02     | 2.54  | 4.98   | 11.78  | 10.35 | 12.23  | 16.54   | 1.56   | 16.16  | 1.73    | 1.48  | 1.28   | 1.93    | 1.55  | 1.40  |
| 67 | 10.19    | 2.36  | 4.38   | 8.53   | 10.18 | 15.69  | 6.89    | 2.03   | 9.30   | 1.27    | 1.46  | 1.81   | 1.28    | 1.64  | 1.42  |
| 68 | 3.22     | 3.59  | 5.54   | 11.70  | 8.39  | 11.54  | 8.58    | 1.91   | 15.14  | 1.31    | 1.27  | 2.13   | 1.54    | 3.36  | 2.20  |
| 69 | 11.53    | 7.87  | 11.41  | 7.14   | 16.01 | 17.44  | 6.33    | 3.96   | 9.67   | 3.63    | 4.79  | 6.99   | 3.43    | 5.46  | 5.01  |
| 70 | 14.93    | 26.40 | 4.74   | 17.92  | 8.26  | 12.89  | 15.19   | 102.80 | 17.67  | 13.53   | 9.66  | 12.07  | 6.77    | 7.25  | 8.24  |
| 71 | 3.27     | 6.25  | 13.03  | 9.32   | 10.82 | 10.71  | 30.15   | 2.33   | 4.10   | 7.65    | 6.34  | 5.70   | 1.33    | 2.04  | 1.25  |
| 72 | 3.38     | 2.28  | 3.90   | 17.30  | 5.23  | 21.30  | 7.87    | 2.10   | 17.83  | 2.23    | 1.47  | 1.36   | 1.69    | 2.46  | 1.57  |
| 73 | 23.41    | 6.75  | 11.29  | 12.05  | 8.63  | NA     | 7.36    | 4.16   | 16.93  | 1.23    | 3.53  | 2.38   | 1.21    | 2.65  | 1.73  |
| 74 | 6.45     | 8.67  | 6.24   | 18.74  | 14.90 | 19.06  | 17.62   | 51.50  | 24.59  | 15.67   | 14.91 | 18.54  | 9.12    | 7.01  | 13.02 |
| 75 | 3.53     | 3.41  | 5.44   | 10.74  | 7.19  | 10.95  | 5.81    | 2.59   | 6.37   | 1.42    | 1.21  | 3.15   | 1.20    | 1.97  | 1.87  |
| 76 | 7.03     | 3.41  | 4.97   | 9.31   | 7.83  | 18.27  | 2.35    | 2.34   | 18.01  | 1.16    | 1.38  | 2.37   | 1.23    | 1.21  | 1.44  |
| 77 | 7.19     | 3.12  | 4.63   | 7.07   | 9.19  | 14.34  | 6.51    | 2.17   | 18.88  | 1.04    | 1.61  | 1.40   | 1.08    | 1.56  | 1.62  |
| 78 | 7.18     | 2.44  | 131.84 | 19.76  | 8.16  | 12.23  | 17.79   | 2.20   | 133.97 | 2.01    | 2.00  | 80.90  | 1.45    | 2.09  | 68.18 |
| 79 | 16.13    | 2.85  | 7.67   | 14.01  | 6.15  | 18.81  | 24.63   | 1.90   | 28.78  | 1.85    | 1.28  | 1.35   | 1.01    | 1.28  | 1.14  |
| 80 | 4.91     | 3.02  | 5.97   | 18.21  | 14.45 | 18.21  | 15.73   | 2.40   | 13.23  | 1.00    | 1.49  | 1.06   | 0.75    | 1.39  | 0.68  |
| 81 | 4.17     | 4.14  | 8.00   | 13.42  | 14.91 | 15.48  | 5.08    | 3.69   | 4.33   | 1.90    | 1.72  | 1.98   | 1.56    | 3.27  | 2.    |

**Supplementary Table 5. Detailed list of structure comparisons per individual for prostate, rectum, bladder, and bilateral femoral heads (femur\_L, femur\_R). Comparisons all versus clinician-delineated contours via 95% Hausdorff distance (HD) in millimeters. Results are for model-based (MB), deep learning (DL), and atlas-based (AB) algorithms.**

| ID | Prostate |       |        | Rectum |       |        | Bladder |        |        | Femur_L |       |        | Femur_R |       |        |
|----|----------|-------|--------|--------|-------|--------|---------|--------|--------|---------|-------|--------|---------|-------|--------|
|    | MB       | DL    | AB     | MB     | DL    | AB     | MB      | DL     | AB     | MB      | DL    | AB     | MB      | DL    | AB     |
| 1  | 38.81    | 5.21  | 10.68  | 58.16  | 34.08 | 40.22  | 44.79   | 3.10   | 4.73   | 38.03   | 3.12  | 2.29   | 37.12   | 4.02  | 3.38   |
| 2  | 33.01    | 6.58  | 9.21   | 46.98  | 30.56 | NA     | 28.32   | 3.96   | 51.45  | 12.02   | 2.69  | 4.03   | 3.26    | 3.17  | 3.85   |
| 3  | 14.60    | 6.50  | 11.00  | 19.54  | 42.02 | 48.09  | 16.65   | 6.78   | 40.12  | 8.01    | 2.20  | 2.11   | 2.49    | 4.08  | 1.92   |
| 4  | 7.94     | 5.83  | 24.50  | 34.15  | 30.15 | 28.03  | 5.26    | 3.29   | 18.67  | 3.43    | 4.24  | 4.33   | 2.54    | 8.06  | 2.72   |
| 5  | 14.53    | 8.34  | 80.83  | 43.77  | 24.46 | 28.32  | 7.62    | 4.14   | NA     | 4.28    | 20.19 | 28.06  | 4.53    | 26.14 | 40.26  |
| 6  | 31.82    | 24.49 | 25.01  | 32.00  | 55.66 | 58.56  | 44.65   | 7.05   | 24.53  | 16.00   | 2.31  | 2.71   | 6.08    | 3.05  | 3.89   |
| 7  | 35.76    | 11.03 | NA     | 16.95  | 21.88 | 42.01  | 38.93   | 6.80   | NA     | 2.62    | 12.03 | 24.00  | 2.26    | 26.31 | 35.77  |
| 8  | 14.27    | 11.22 | 23.18  | 51.18  | 23.88 | 31.93  | 4.92    | 10.00  | 12.52  | 4.08    | 7.07  | 4.15   | 2.49    | 8.19  | 4.42   |
| 9  | 8.66     | 6.00  | 15.39  | 40.15  | 37.33 | 40.58  | 2.80    | 2.29   | 15.73  | 16.99   | 51.59 | 31.18  | 18.26   | 51.89 | 26.36  |
| 10 | NA       | NA    | 15.62  | NA     | NA    | 48.65  | NA      | NA     | 60.14  | NA      | NA    | 3.11   | NA      | NA    | NA     |
| 11 | 13.45    | 9.83  | 20.72  | 25.76  | 32.10 | 28.13  | 3.97    | 3.95   | 22.94  | 4.39    | 2.95  | 2.36   | 2.18    | 4.76  | 2.91   |
| 12 | 35.87    | 10.19 | 21.62  | 46.97  | 39.36 | 36.60  | 63.76   | 45.78  | NA     | 10.06   | 31.62 | 36.51  | NA      | NA    | NA     |
| 13 | 14.40    | 6.48  | 144.31 | 35.70  | 38.16 | 87.25  | 54.19   | 9.05   | NA     | 2.51    | 4.08  | 94.95  | 3.46    | 16.00 | 108.07 |
| 14 | 42.84    | 48.08 | 29.87  | 43.91  | 34.76 | 16.84  | 53.37   | 53.55  | 16.13  | 19.60   | 21.23 | 6.20   | 18.06   | 24.25 | 3.02   |
| 15 | 22.35    | 13.63 | 12.34  | 36.20  | 35.18 | 44.07  | 5.47    | 3.14   | 85.98  | 11.18   | 6.05  | 38.24  | 2.23    | 8.17  | 12.07  |
| 16 | 8.81     | 5.49  | 142.23 | 25.17  | 38.28 | 50.16  | 12.66   | 4.99   | NA     | 2.50    | 2.77  | 50.35  | 3.55    | 10.26 | 34.38  |
| 17 | 12.75    | 8.65  | 11.37  | 66.58  | 53.12 | 52.46  | 6.09    | 4.12   | 59.20  | 4.32    | 2.50  | 2.90   | 2.27    | 12.11 | 2.14   |
| 18 | 11.67    | 8.04  | 24.91  | 43.70  | 25.44 | NA     | 3.85    | 4.86   | 22.40  | 4.22    | 3.87  | 6.18   | 5.42    | 15.02 | 6.08   |
| 19 | 10.23    | 8.86  | 18.52  | 36.00  | 24.26 | 43.89  | 6.99    | 3.66   | 14.03  | 2.38    | 7.03  | 8.61   | 2.21    | 8.06  | 2.52   |
| 20 | 16.70    | 5.68  | 15.15  | 45.57  | 36.18 | 54.32  | 29.47   | 3.69   | 10.01  | 96.01   | 63.53 | 55.70  | 4.58    | 21.41 | 9.25   |
| 21 | 11.13    | 8.58  | 11.79  | 71.14  | 34.07 | 18.36  | 3.14    | 4.31   | 16.05  | 28.44   | 2.53  | 2.75   | 18.11   | 2.47  | 2.54   |
| 22 | 17.00    | 21.25 | 150.01 | 38.29  | 24.25 | 132.56 | 54.16   | 20.52  | NA     | 5.07    | 3.59  | 144.87 | 4.95    | 3.65  | NA     |
| 23 | 11.28    | 14.98 | NA     | 57.14  | 26.18 | 114.20 | 46.83   | 22.22  | NA     | 6.08    | 2.88  | 26.27  | 2.87    | 2.68  | 50.68  |
| 24 | 6.58     | 5.61  | 148.35 | 37.28  | 40.63 | 118.14 | 10.01   | 4.99   | NA     | 13.76   | 3.05  | 85.99  | 6.15    | 2.81  | 104.29 |
| 25 | 23.83    | 6.78  | NA     | 31.95  | 66.44 | NA     | 24.93   | 4.03   | NA     | 13.00   | 42.37 | 11.44  | 24.04   | 34.83 | 26.79  |
| 26 | 22.37    | NA    | 152.00 | 39.55  | NA    | 70.40  | 33.53   | NA     | NA     | 2.44    | NA    | 112.40 | NA      | NA    | NA     |
| 27 | 26.05    | 8.39  | 12.33  | 48.01  | 46.40 | 66.03  | 58.39   | 6.24   | 34.57  | 2.82    | 12.06 | 4.35   | 2.33    | 16.24 | 4.47   |
| 28 | 38.16    | 46.23 | 27.18  | 55.82  | 36.95 | 38.06  | 25.42   | 31.22  | 21.34  | 73.30   | 50.04 | 58.85  | 119.41  | 66.48 | 108.29 |
| 29 | 28.85    | 21.74 | 19.71  | 17.90  | 18.01 | 21.01  | 7.49    | 6.09   | 27.18  | 12.78   | 3.10  | 4.70   | 3.54    | 3.34  | 3.66   |
| 30 | 14.60    | 14.76 | 21.68  | 34.05  | 29.55 | 44.40  | 10.83   | 2.70   | 8.77   | 14.01   | 2.84  | 2.56   | 5.26    | 2.89  | 2.62   |
| 31 | 22.35    | 8.66  | 15.70  | 38.06  | 36.14 | 47.52  | 3.01    | 3.11   | 12.06  | 2.46    | 16.35 | 7.95   | 3.01    | 23.15 | 4.01   |
| 32 | 30.62    | 5.85  | 9.39   | 30.44  | 41.51 | 47.31  | 86.07   | 2.65   | 17.33  | 32.57   | 4.76  | 4.46   | 28.50   | 2.29  | 10.08  |
| 33 | 13.33    | 4.24  | 176.53 | 29.09  | 35.24 | NA     | 28.79   | 3.62   | NA     | 4.06    | 6.13  | 224.35 | 2.66    | 18.10 | NA     |
| 34 | 24.23    | 9.73  | 13.68  | 58.79  | 52.54 | 60.91  | 3.52    | 3.81   | 47.81  | 22.04   | 45.82 | 40.32  | 23.31   | 56.02 | 34.00  |
| 35 | 51.75    | 15.92 | 27.36  | 38.56  | 40.22 | 38.59  | 75.70   | 6.08   | NA     | 33.34   | 49.95 | 36.97  | 2.30    | 12.67 | 4.41   |
| 36 | 25.03    | 39.07 | 40.03  | 38.41  | 30.00 | 34.52  | 29.76   | 48.64  | 44.09  | 2.59    | 27.35 | 16.95  | 6.38    | 33.26 | 22.16  |
| 37 | 44.74    | 10.28 | 70.66  | 75.89  | 47.77 | 53.66  | 3.52    | 3.09   | 58.87  | 13.01   | 2.90  | 6.41   | 7.01    | 2.77  | 18.41  |
| 38 | 22.27    | 4.96  | 10.40  | 18.23  | 23.13 | 57.35  | 32.75   | 8.53   | 34.25  | 6.20    | 3.43  | 15.82  | 2.29    | 3.22  | 14.59  |
| 39 | 8.39     | 6.50  | 10.24  | 46.68  | 37.37 | 50.54  | 2.81    | 7.83   | 3.50   | 2.29    | 2.70  | 8.44   | 2.41    | 19.01 | 4.42   |
| 40 | 28.78    | 16.05 | 143.73 | 51.24  | 44.16 | NA     | 5.54    | 22.92  | 134.12 | 12.99   | 35.09 | 111.82 | 22.18   | 30.17 | 97.13  |
| 41 | 62.41    | 8.45  | 160.08 | 64.87  | 52.91 | NA     | 61.47   | 5.40   | 154.70 | 3.33    | 2.97  | 85.12  | 2.23    | 8.42  | 92.56  |
| 42 | 27.07    | 7.93  | 6.11   | 18.52  | 46.50 | 66.96  | 49.12   | 9.39   | 46.16  | 2.31    | 12.21 | 15.58  | 3.12    | 12.23 | 16.03  |
| 43 | 19.53    | 14.40 | 11.79  | 42.39  | 34.76 | NA     | 18.20   | 8.01   | 58.56  | 24.22   | 2.66  | 4.54   | 6.24    | 2.25  | 4.81   |
| 44 | 41.96    | 6.38  | 8.53   | 46.03  | 42.54 | 51.05  | 21.86   | 3.20   | 9.18   | 14.29   | 3.67  | 2.56   | 2.51    | 6.21  | 2.72   |
| 45 | 34.50    | 7.41  | 12.53  | 32.35  | 40.99 | 41.83  | 30.56   | 3.06   | 29.39  | 2.98    | 7.55  | 2.43   | 2.20    | 12.01 | 2.28   |
| 46 | 17.99    | 5.63  | 14.13  | 58.28  | 45.76 | 54.87  | 11.42   | 7.39   | 28.31  | 10.10   | 36.13 | 28.36  | 26.01   | 44.97 | 34.27  |
| 47 | 22.36    | 6.06  | 13.78  | 29.09  | 38.30 | 48.59  | 4.29    | 5.18   | 9.47   | 2.24    | 12.95 | 10.12  | 2.29    | 20.01 | 6.05   |
| 48 | 25.53    | 7.02  | 13.29  | 67.93  | 47.30 | 70.04  | 32.71   | 3.14   | 32.28  | 6.38    | 10.07 | 3.28   | 3.31    | 10.37 | 2.42   |
| 49 | 29.35    | 55.99 | 21.10  | 54.67  | 67.01 | 72.01  | 41.99   | 41.40  | 23.20  | 36.38   | 48.26 | 41.02  | 30.19   | 44.02 | 36.95  |
| 50 | 31.71    | 9.93  | 15.60  | 38.55  | 33.24 | 64.43  | 16.72   | 5.02   | 36.97  | 10.13   | 3.12  | 11.19  | 3.11    | 2.83  | 12.87  |
| 51 | 31.65    | 36.33 | 39.73  | 25.80  | 33.96 | 33.55  | 6.74    | 3.04   | 4.39   | 3.57    | 4.12  | 3.67   | 2.86    | 18.41 | 3.19   |
| 52 | 35.97    | 6.45  | 9.27   | 60.06  | 36.25 | NA     | 23.90   | 4.55   | 28.51  | 9.35    | 45.14 | 26.23  | 26.05   | 58.10 | 32.25  |
| 53 | 10.00    | 5.10  | 9.66   | 48.34  | 44.03 | 52.58  | 3.74    | 2.43   | 6.74   | 15.27   | 42.34 | 40.01  | 22.48   | 48.00 | 35.01  |
| 54 | 56.99    | 6.59  | 9.01   | 43.60  | 31.44 | 41.96  | 89.73   | 7.40   | 71.08  | 2.26    | 14.03 | 10.32  | 2.32    | 13.19 | 21.19  |
| 55 | 66.29    | 11.74 | 12.58  | 29.89  | 40.07 | 26.30  | 35.65   | 2.38   | 10.14  | 16.11   | 2.11  | 2.78   | 4.09    | 3.46  | 2.27   |
| 56 | 19.28    | 13.16 | 15.04  | 46.01  | 39.03 | 54.01  | 4.71    | 4.05   | 5.53   | 12.50   | 5.49  | 2.60   | 3.19    | 18.31 | 2.90   |
| 57 | NA       | NA    | NA     | 40.47  | 30.36 | 34.18  | 4.57    | 4.47   | 21.15  | 2.35    | 2.59  | 7.09   | 2.48    | 10.65 | 14.08  |
| 58 | NA       | NA    | 10.06  | NA     | NA    | 43.41  | NA      | NA     | 70.04  | NA      | NA    | 2.51   | NA      | NA    | 2.61   |
| 59 | 17.02    | 8.72  | 10.68  | 36.24  | 34.14 | 50.36  | 2.60    | 2.88   | 6.41   | 2.93    | 30.20 | 28.02  | 14.01   | 35.94 | 28.01  |
| 60 | 8.43     | 5.91  | 14.69  | 65.24  | 48.22 | 46.75  | 3.20    | 4.15   | 11.74  | 6.19    | 14.18 | 3.66   | 2.38    | 26.14 | 4.10   |
| 61 | 10.72    | 7.41  | NA     | 36.37  | 27.07 | 30.02  | 3.07    | 5.95   | NA     | 4.74    | 4.11  | 8.60   | 3.39    | 4.03  | 6.42   |
| 62 | 6.73     | 4.20  | 8.08   | 32.32  | 43.54 | 50.01  | 29.42   | 4.01   | 44.32  | 6.02    | 6.03  | 2.17   | 2.60    | 12.13 | 2.53   |
| 63 | 12.74    | 10.81 | 13.64  | 40.99  | 44.01 | 44.27  | 47.57   | 10.09  | 40.96  | 2.34    | 8.11  | 8.00   | 3.01    | 20.46 | 10.89  |
| 64 | 7.69     | 7.10  | 10.22  | 47.17  | 36.06 | 47.18  | 4.35    | 3.42   | 9.64   | 8.91    | 6.38  | 6.02   | 2.29    | 20.06 | 4.29   |
| 65 | 47.23    | 12.29 | 31.52  | 52.00  | 38.39 | 49.10  | 51.97   | 3.01   | 24.97  | 19.78   | 2.29  | 7.49   | 11.61   | 2.82  | 8.92   |
| 66 | 16.41    | 5.92  | 10.61  | 38.02  | 38.00 | 38.97  | 49.47   | 3.28   | 42.16  | 4.47    | 2.96  | 3.37   | 6.15    | 3.16  | 3.82   |
| 67 | 22.07    | 5.45  | 8.83   | 26.56  | 36.49 | 50.10  | 24.11   | 5.32   | 28.16  | 2.57    | 3.46  | 8.30   | 2.51    | 4.06  | 4.23   |
| 68 | 9.75     | 8.69  | 12.66  | 42.15  | 35.70 | 43.19  | 38.06   | 4.36   | 36.92  | 2.86    | 3.06  | 9.05   | 3.70    | 22.93 | 8.53   |
| 69 | 30.17    | 29.03 | 35.12  | 18.56  | 45.33 | 55.69  | 17.81   | 15.36  | 30.29  | 20.12   | 28.03 | 34.02  | 20.06   | 32.01 | 26.46  |
| 70 | 27.64    | 41.81 | 10.27  | 59.33  | 30.03 | 39.02  | 34.94   | 155.66 | 40.40  | 35.67   | 38.49 | 32.45  | 24.05   | 24.01 | 25.38  |
| 71 | 8.72     | 18.65 | 28.58  | 34.25  | 30.88 | 33.11  | 76.86   | 7.94   | 13.80  | 27.04   | 27.77 | 20.19  | 2.75    | 4.31  | 3.21   |
| 72 | 10.60    | 5.15  | 7.89   | 62.49  | 21.62 | 65.31  | 34.26   | 4.78   | 43.58  | 9.17    | 4.05  | 3.72   | 4.15    | 9.17  | 5.26   |
| 73 | 46.01    | 18.25 | 26.96  | 44.87  | 32.69 | NA     | 29.90   | 20.03  | 51.41  | 2.41    | 24.03 | 13.78  | 2.36    | 16.10 | 8.50   |
| 74 | 14.04    | 18.33 | 16.02  | 58.93  | 55.63 | 56.35  | 46.19   | 79.60  | 62.49  | 58.19   | 61.08 | 56.61  | 34.73   | 37.97 | 49.31  |
| 75 | 9.75     | 10.42 | 13.39  | 40.83  | 30.07 | 38.06  | 23.33   | 9.63   | 20.80  | 4.02    | 2.82  | 21.49  | 2.40    | 8.24  | 8.06   |
| 76 | 16.05    | 8.99  | 10.28  | 32.41  | 36.04 | 56.01  | 6.16    | 7.03   | 47.83  | 2.42    | 3.00  | 12.55  | 2.63    | 2.85  | 4.31   |
| 77 | 14.13    | 7.03  | 9.64   | 28.47  | 42.91 | 48.00  | 29.68   | 4.15   | 55.92  | 2.12    | 6.03  | 5.10   | 2.16    | 4.25  | 6.26   |
| 78 | 16.20    | 5.57  | 150.19 | 62.34  | 36.00 | 42.06  | 57.15   | 5.87   | 150.69 | 12.06   | 10.00 | 121.35 | 6.05    | 8.88  | 112.21 |
| 79 | 30.98    | 6.59  | 13.08  | 42.00  |       |        |         |        |        |         |       |        |         |       |        |
